# Supplementary material
Source: PubMed Central journal article supplement (PMC8546779)
Supplement: NIHMS1722572-supplement-supplementary.pdf [file NIHMS1722572-supplement-supplementary.pdf]

1 **Supplementary Methods**

2 **Chemicals, Peptides, and Recombinant Proteins**

3 Caerulein (Cayman, Cat#24408), Gemcitabine (Teva Parenteral Medicine  
4 Inc, Cat#NDC0703-5778-01), Aminooxyacetic acid (AOA; MedChemExpress,  
5 Cat#HY-107994), BPTES (Sigma-Aldrich, Cat#SML0601), EGCG (Cayman,  
6 Cat#70935), Matrigel Matrix (Corning, Cat#354234), [U-<sup>13</sup>C<sub>5</sub>] glutamine  
7 (Cambridge Isotope Laboratories, Cat# CLM-1822-H-PK), DAPI (Invitrogen,  
8 Cat#P36935), Hematoxylin (Leica, Cat#3801570), Alcoholic Eosin (Leica,  
9 Cat#3801615), Turbofect transfection reagent, (Thermo Fisher, Cat#R0532),  
10 Dispase II (Sigma-Aldrich, Cat#D4693), TRIzol (Thermo Fisher,  
11 Cat#15596026), Pierce IP Lysis Buffer (Thermo Fisher, Cat#87788), Epitope  
12 Retrieval Solution (pH 6; Leica, Cat#6064204), PowerUP SYBR Green  
13 Mastermix (Applied Biosystems, Cat#A25742), 3-[4,5-dimethylthiazol-2-yl]-2,5-  
14 diphenyltetrazolium bromide (MTT; Sigma Aldrich, Cat#M2128), Nonidet P-40  
15 (Sigma Aldrich, Cat#74385-1L), Tris-HCl (Sigma Aldrich, Cat#T5941-500G),  
16 EDTA (Sigma Aldrich, Cat#E6758-500G), SRT2104 (MedChemExpress,  
17 Cat#HY-15262), Honokiol (Sigma-Aldrich, Cat#42612), Skim Milk (BD Difco,  
18 Cat#232100), B-27™ Supplement (Thermo Fisher, Cat#17504044), PGE2  
19 (Sigma-Aldrich, Cat#A0409-1MG), Nicotinamide (Sigma-Aldrich, Cat#A0636-  
20 100G), N-acetylcysteine (Sigma-Aldrich, Cat#A9165-100G), hGastrin I  
21 (TOCRIS, Cat#3006), hFGF10 (PeproTech, Cat#100-26), mNoggin  
22 (PeproTech, Cat#250-38), hEGF (PeproTech, Cat# AF-100-15), A 83-01  
23 (TOCRIS, Cat#2939), DMEM/F12 (Sigma-Aldrich, Cat#DF-041), HEPES  
24 (Sigma-Aldrich, Cat#H4034), Matrigel (Corning, Cat#354234), Y-27632 (Hello  
25 Bio, Cat#HB2297), Collagenase XI (Sigma-Aldrich, Cat#C7657-25MG), DNase  
26 I (Sigma-Aldrich, Cat#11284932001).

27

28 **Commercial Assays**

29 CellTiter-Glo cell Viability Assay Kit (Promega, Cat#G7570), Verso cDNA  
30 Synthesis Kit (Thermo Fisher Scientific, Cat#1453A), VetScan Comprehensive  
31 Diagnostic Profile (Abaxis, Cat#500-0038-48), Plasmid Maxi kit (Qiagen,  
32 Cat#12163), Vectastain ABC Kit (Vector Biolabs, Cat#PK6101), DAB Substrate  
33 Kit (Vector Biolabs, Cat#SK-4105), Alcian Blue Stain Kit (IHC World, Cat#IW-  
34 3000), GOT Activity Assay Kit (Sigma Aldrich, Cat#MAK055), Glutaminase  
35 Activity Assay Kit (Biomedical Research Service, Cat#E-133), GDH Activity  
36 Assay Kit (Biomedical Research Service, Cat#E-123), KOD-Plus-Mutagenesis  
37 Kit (Toyobo, Cat#SMK101), SIRT1 Activity Assay Kit (Abcam, Cat#ab156065),  
38 SIRT3 Activity Assay Kit (Abcam, Cat#ab156067), SIRT5 Activity Assay Kit  
39 (Abcam, Cat#ab210074), Mycoplasma PCR Detection Kit (abm, Cat#G238).

40

41 **Organoid Culture and Experiments**

42 The detailed procedure for generating organoids was performed as  
43 previously identified <sup>1</sup>. In brief, the tissue from the patient-derived xenografts  
44 (PDX) were minced and then incubated in the digestion media (Human  
45 Complete Medium containing 10 µg/mL DNase I, 1 mg/mL Collagenase XI,  
46 10.5 µM Y-27632) at 37°C with gentle rotation for 1 hour. Cells were collected  
47 and then seeded with Matrigel (cat#354234, Corning). The organoids were  
48 cultured in Human Complete Feeding Medium (advanced DMEM/F12  
49 containing 10 mM HEPES, 1X Glutamax, 500 nM A83-01, 50 ng/mL hEGF, 100  
50 ng/mL mNoggin, 100 ng/mL hFGF10, 0.01 µM hGastrin I, 1.25 mM N-  
51 acetylcysteine, 10 mM nicotinamide, 1 µM PGE2, 1X B27 supplement, 10% R-  
52 spondin1 conditioned media, and 50% Wnt3A-conditioned media). For the  
53 indicated experiments,  $2 \times 10^3$  organoid cells were suspended in 50 µL Matrigel  
54 per well and seeded in 24 well plates. Cytation 3 Cell Imaging Multi-Mode  
55 Reader was used to capture the size of the organoids. CellTiter-Glo kit  
56 (Promega; Madison, WI, USA) was used to measure the cell viability of  
57 organoids 72-hours post-treatment.

58

### 59 ***In Vivo* Mouse Studies**

60 We utilized the following mice strains: Athymic *Foxn1<sup>nu</sup>/Foxn1<sup>nu</sup>* (Taconic  
61 Biosciences), C57BL/6 (The Jackson Laboratory), NOD scid gamma (NSG<sup>TM</sup>;  
62 The Jackson Laboratory), *Sirt5<sup>flox/flox</sup>* (Provided by Dr. Johan Auwerx), *LSL-  
63 Kras<sup>G12D/+</sup>* (NCI), *LSL-Trp53<sup>R172H/+</sup>* (NCI), *Pdx-1-Cre* (NCI). All animal  
64 experiments were conducted under the protocols approved by the institutional  
65 animal care and use committee (IACUC) at the University of Nebraska Medical  
66 Center (UNMC). The animal facility of UNMC bred and housed the athymic  
67 nude mice (*Foxn1<sup>nu</sup>/Foxn1<sup>nu</sup>*) as well as the NOD *scid* gamma (NSG<sup>TM</sup>;  
68 NOD.Cg-*Prkdc<sup>scid</sup> Il2rg<sup>tm1Wjl</sup>/SzJ*) mice used for orthotopic implantations. For  
69 the *in vivo* tumor growth experiments,  $5 \times 10^5$  T3M4-shScramble or T3M4-  
70 shSIRT5 cells were injected into the pancreatic tissue of six-week-old female  
71 NOD-SCID mice. After 6 days following implantation, tumor diameters were  
72 measured by calipers every three days, and tumor volumes were calculated  
73 using the following formula: volume =  $0.5 \times (\text{longer diameter} \times \text{shorter}$   
74  $\text{diameter}^2)$ . For the AOA treatment studies,  $2 \times 10^6$  T3M4-shScramble and  
75 T3M4-shSIRT5 were injected into the pancreas of eight-week-old female nude  
76 mice. When the tumor size reached approximately 100 mm<sup>3</sup>, the mice were  
77 randomized into the following two groups: vehicle control group (saline) and  
78 AOA group, which was treated daily with 10 mg/kg AOA. Body weight and tumor  
79 volume were measured twice a week during the treatment. At the end of  
80 treatment, mice were euthanized to collect tumor weight and tumor volume.  
81 Mice organs and tumor tissues were excised, frozen in liquid nitrogen or fixed  
82 with 4% paraformaldehyde, and embedded in paraffin for further analysis.

83

## 84 **Patient-Derived Xenograft (PDX) Studies**

85 Eight to ten weeks old male NOD *scid* gamma (NSG<sup>TM</sup>; NOD.Cg-*Prkdc*<sup>*scid*</sup>  
86 *Il2rg*<sup>*tm1Wjl*</sup>/SzJ) mice were used to implant orthotopic PDX tumors. The PDX  
87 (PA137) tumors were cut into 3-5 mm pieces and then orthotopically implanted  
88 to the mouse pancreas. When the tumor size reached around 100 mm<sup>3</sup>, mice  
89 were randomized into four groups with similar tumor volumes: control group,  
90 gemcitabine (diluted in saline, 25 mg/kg, twice per week), MC3138 [diluted in  
91 DMSO: corn oil (1:9) solution, 200 mg/kg, daily] and gemcitabine with MC3138.  
92 Gemcitabine and MC3138 were administered by intraperitoneal injections. and  
93 gemcitabine with MC3138. Blinding was not possible for the mouse studies.  
94 Tumor diameters and body weight were measured every four days. After 20  
95 days of treatment, mice were euthanized to collect tumor weight and tumor  
96 volume. Mice organs and tumor tissues were excised, frozen in liquid nitrogen  
97 or fixed with 4% paraformaldehyde, and embedded in paraffin for further  
98 analysis.

99

## 100 **RNA Extraction and qRT-PCR Analysis**

101 Total RNA from cell lines and tissues were extracted using TRIzol reagent.  
102 Reverse transcription analyses used the Verso-cDNA synthesis kit, according  
103 to the manufacturer's instructions. QuantStudio 5 Real-Time PCR System  
104 (Thermo Fisher Scientific; Waltham, MA, USA) and SYBR Green PCR Master  
105 Mix were used to perform the qPCR according to the manufacturer's protocol.  
106 Quantification of target genes was normalized by 18S ribosomal RNA using the  
107 2- $\Delta\Delta$ Ct method <sup>2</sup>. The primer sequences used for qPCR analysis are listed in  
108 Supplementary Table S4.

109

## 110 **Antibodies**

111 Rabbit Anti-SIRT5 (HPA022002; RRID: AB\_1856913; Sigma-Aldrich),  
112 Rabbit Anti-Amylase (A8273; AB\_258380; Sigma-Aldrich), Rabbit Anti-  
113 cytokeratin19 (TROMA-III; RRID: AB\_2133570; DHSB), Rabbit Anti-  
114 Glutaminase (ab93434; RRID: AB\_10561964; Abcam), Rabbit Anti-Glutamate  
115 Dehydrogenase, (12793; RRID: AB\_2750880; Cell Signaling Technology),  
116 Mouse Anti- $\beta$ -actin (JLA20; RRID: AB\_528068; DHSB), Rabbit Anti-GOT1  
117 (HPA072629; RRID: AB\_2686540; Sigma-Aldrich), Rabbit Anti-GOT1 (14886-  
118 1-AP, RRID:AB\_2113630; Thermo Fisher), Rabbit Anti-GOT2 (ab171739;  
119 Abcam), Rabbit Anti-Cleaved Caspase3 (9664; RRID: AB\_2070042; Cell  
120 Signaling Technology), Rabbit Anti-Ki67 (12202; RRID: AB\_2620142; Cell  
121 Signaling Technology), Rabbit Pan anti-succinyllysine (PTM401; RRID:  
122 AB\_2687628; PTM Biolabs), Rabbit Pan anti-malonyllysine (PTM901; RRID:  
123 AB\_2687947; PTM Biolabs), Rabbit Pan anti-glutaryllysine (PTM1151; PTM  
124 Biolabs), Rabbit Pan anti-acetylated-lysine (9441; RRID: AB\_331805; Cell  
125 Signaling Technology), Pierce Anti-HA Magnetic Beads (Cat#88837; Thermo

126 Fisher Scientific), Pierce Protein A/G Magnetic Beads (88803; Thermo Fisher  
127 Scientific), Donkey Anti-Rabbit Af594 (711-585-152; RRID: AB\_2340621;  
128 Jackson Immunoresearch), Donkey Anti-Rat Af488 (712-545-153; RRID:  
129 AB\_2340684; Jackson Immunoresearch), IgG Fraction, mouse anti-rabbit, light  
130 chain specific (211-002-171;RRID: AB\_2339146; Jackson Immunoresearch),  
131 HA antibody (MMS-101R; RRID: AB\_291262; Covance), Peroxidase AffiniPure  
132 Goat Anti-Mouse IgG, light chain specific (115-035-174; AB\_2338512; Jackson  
133 Immunoresearch).

134

### 135 **Immunoblotting**

136 Cell lysates were extracted from cell culture dishes in RIPA lysis buffer  
137 (50mM Tris-HCl pH 8.0 containing 150mM NaCl, 1% Nonidet P-40, 5mM EDTA  
138 and 1mM phenylmethylsulphonyl fluoride). Protein samples were separated by  
139 sodium dodecyl sulphate-polyacrylamide gel electrophoresis (SDS-PAGE) and  
140 transferred to polyvinylidene fluoride (PVDF) membranes. The membranes  
141 were blocked with 5% skim milk and then probed overnight at 4°C with indicated  
142 primary antibodies. After incubation with horseradish peroxidase (HRP)  
143 conjugated secondary antibodies, the specific protein bands were detected  
144 using Pierce™ ECL Western Blotting Substrate and ChemiDoc Imaging  
145 System (Bio-Rad; Hercules, CA, USA). Immunoblotting assays to detect  
146 acetylation levels of purified GOT1 protein used the light-chain specific  
147 secondary antibody.

### 148 **Immunoprecipitation (IP) and Proteomic Analysis**

149 The indicated PDAC cells transfected with HA-GOT1 for 48h were lysed in  
150 Pierce™ IP Lysis Buffer (87787, Thermo Fisher). Cell lysates were pre-cleared  
151 by Pierce™ Protein A/G Magnetic Beads and then incubated with anti-HA  
152 Magnetic Beads overnight at 4°C. After washing with IP Lysis Buffer five times  
153 and subsequently boiling with 2X sample buffer for 10 minutes, the GOT1-IP  
154 samples were then purified and resolved by SDS-PAGE. Following the  
155 Coomassie Brilliant Blue staining and in-gel digestion, the GOT1 peptide  
156 mixture was processed for proteomic analysis by LC-MS/MS at the Mass  
157 Spectrometry and Proteomics Core at UNMC. For cells expressing wild-type  
158 GOT1, K276R, K290R, and K369R mutant GOT1, cells were lysed in IP Lysis  
159 Buffer and then pre-cleared by Pierce™ Protein A/G Magnetic Beads. After  
160 incubating the pre-cleared lysates with anti-HA Magnetic Beads overnight at  
161 4°C, the immune complexes were resolved by SDS-PAGE, followed by  
162 immunoblotting analysis. For endogenous IP, control and *SIRT5*-knockdown  
163 PDAC cells were lysed in Pierce™ IP Lysis Buffer. The IP-grade GOT1  
164 antibody (14886-1-AP, Thermo Fisher) was conjugated to Pierce™ Protein A/G  
165 Magnetic Beads at 4°C for four hours before IP experiment. Cell lysates were  
166 pre-cleared by Pierce™ Protein A/G Magnetic Beads and then incubated with  
167 GOT1 antibody-Magnetic Beads mixture overnight at 4°C. The immune



168 complexes were washed with IP Lysis Buffer for five times and subsequently  
169 boiled with 2X sample buffer for 10 minutes, the GOT1-IP samples were then  
170 resolved by SDS-PAGE. The endogenous acetylation level of GOT1 was  
171 determined by western blotting using an anti-Acetylation antibody (CST,  
172 9441S).

173

### 174 **Histology**

175 Pancreatic tissues were fixed with 4% paraformaldehyde, embedded in  
176 paraffin and then analyzed with hematoxylin and eosin (H&E),  
177 immunofluorescence, immunohistochemistry, or Alcian blue staining on 5µm  
178 sections. For immunofluorescence, paraffin-embedded tissue slides were  
179 deparaffinized by xylene and hydrated using decreasing ethanol gradients.  
180 Next, tissue slides were probed with primary antibodies diluted in PBST with 5%  
181 BSA at 4°C overnight, followed by incubation with 1:100 secondary antibodies  
182 conjugated with Alexa Fluor® 488 donkey anti-rat IgG and Alexa Fluor® 594  
183 donkey anti-rabbit IgG. After being mounted using Anti-fade Fluorescence  
184 Mounting Media with DAPI, images were captured using an inverted fluorescent  
185 microscope. Alcian blue staining was performed according to manufacturer's  
186 instructions. In brief, the paraffin-embedded tissue sections were deparaffinized  
187 by xylene, hydrated using gradient ethanol and then incubated at room  
188 temperature for 30 minutes with Alcian Blue solution. The tissue sections were  
189 washed with running tap water, followed by counterstaining with eosin.

190

### 191 **Immunohistochemistry**

192 For immunohistochemical analysis of SIRT5, Ki67 and Cleaved Caspase3,  
193 antigen retrieval was performed by boiling the tissue slides in the Epitope  
194 Retrieval Solution (pH 6). After blocking with 5% BSA solution containing 1%  
195 goat serum, slides were incubated with indicated primary antibodies overnight  
196 at 4°C. Next, the slides were incubated by VECTASTAIN® Elite® ABC HRP Kit  
197 (PK-6100, VECTOR, USA) and ImmPACT® DAB Peroxidase (HRP) Substrate  
198 (SK-4105, VECTOR, USA) according to the manufacturer's protocol. The  
199 stained slides were scanned using Roche Ventana iScan HT System (Tissue  
200 Science Facility Core, UNMC). The Ki67 positive staining cells were counted  
201 from three random 20X fields in a section. For SIRT5 IHC score, two  
202 pathologist-trained blinded observers evaluated the IHC results independently  
203 according to an established semi-quantitative approach, which was evaluated  
204 by both the staining intensity and the percentage of positive staining cells in  
205 tumor cells. The staining intensity of the malignant cells was scored as 0, 1, 2,  
206 or 3 for negative, weak, intermediate, and strong staining respectively. The  
207 proportion represents the percentage of positively stained cells (0 = none, 1 =<  
208 5%, 2 = 5 - 25%, 3 = 26 - 50%, 4 = 51 - 75%, 5 >= 75%). The overall protein  
209 expression level in every IHC sample is given as a histoscore, which was

210 calculated by multiplying the proportion (0–5) and intensity scores (0–3). The  
211 value of the histoscore ranges from 0 to 15, with a maximum of 15<sup>3</sup>. For the  
212 survival analysis in Figure 1H-I, low SIRT5 expression is defined as SIRT5 IHC  
213 histoscore < 7.5 and high SIRT5 expression is defined as SIRT5 IHC histoscore  
214 ≥ 7.5.

215  
216

### 217 **Plasmids**

218 The pcDNA3.1-hSIRT5-Flag, pcDNA3.1-hSIRT5 H158Y-HA plasmids were  
219 kindly provided by Dr. Eric Verdin (Addgene plasmid # 13816). The catalytically  
220 inactive mutant SIRT5 H158Y-Flag and pLX304-SIRT5 H158Y were generated  
221 based on pcDNA3.1-hSIRT5-Flag and pLX304-SIRT5 plasmid using KOD-  
222 Plus-Mutagenesis Kit (SMK-101, Toyobo, Japan). The human GOT1-HA  
223 Lentiviral Vector was purchased from Applied Biological Materials Inc.  
224 (LV791704). GOT1 mutant construct K276R, K290R, and K369R were  
225 generated by PCR amplification using KOD-Plus-Mutagenesis Kit based on the  
226 above GOT1-HA vector according to the manufacturer's protocol. The primers  
227 used for plasmid construction are listed in Supplementary Table S4.

228

### 229 **Cell Growth and Clonogenic Assays**

230 For the cell growth assay,  $1 \times 10^5$  PDAC cells were seeded in 6 cm culture  
231 dishes (Corning, USA). These cells were trypsinized, stained with trypan blue  
232 (Gibco, USA) and counted using BioRad TC20 automated cell counter at  
233 indicated time points after inoculation. For the clonogenic assay, 200 PDAC  
234 cells were seeded in six-well cell culture plates (Corning, USA), and cell culture  
235 media was replaced every three days. Colonies were fixed with methanol and  
236 then stained with 0.2% crystal violet in 80% methanol. The soft agar cell colony  
237 formation assay was conducted according to the protocol of CytoSelect 96-Well  
238 Cell Transformation Assay (Cell Biolabs, Inc.; San Diego, CA USA). In brief,  
239 5,000 cells were suspended in 75  $\mu$ L 0.4% agar DMEM solution and seeded  
240 over 50  $\mu$ L of bottom agar in 96-well plates. Images of colonies were captured  
241 after 10 days using the Cytation 3 Cell Imaging Multi-Mode Reader (BioTek  
242 Instruments, Inc.; Winooski, VT, USA). For 3D anchorage-free colony formation  
243 assay, 5,000 cells were seeded in 200  $\mu$ L DMEM supplemented with 10% FBS  
244 in 96-well ultra-low attachment microplate (7007; Corning, USA). Cell culture  
245 media was refreshed every three days, and images of 3D colonies were  
246 captured using Cytation 3 Cell Imaging Multi-Mode Reader. The volume of 3D  
247 colonies was calculated using the formula:  $\text{Volume} = 4/3\pi R^3$

248

### 249 **ROS Assay**

250 The intracellular ROS levels were measured as described previously<sup>4</sup>. In  
251 brief, the oxidation-sensitive fluorescent dye 2',7'-dichlorofluorescein diacetate

252 (DCFDA) was used to detect the ROS level. The control and SIRT5 knockdown  
253 PDAC cells were seeded in a clear-bottom black 96-well plate ( $3 \times 10^4$  cells/per  
254 well). The cell culture medium was refreshed by the DMEM medium containing  
255 20  $\mu$ M DCFDA.  $H_2O_2$  combined with DCFDA was used as the positive control,  
256 while 2',7'-Bis(2-carboxyethyl)-5(6)-carboxyfluorescein (CDCFDA) served as  
257 the negative control and utilized for data normalization. All these cells were  
258 incubated at 37°C for 30 min before testing. The cells were washed with 1X  
259 PBS solution, and next the emission of DCFDA was detected using the BioTek  
260 Cytation 3 plate reader (BioTek Instruments, Inc.; Winooski, VT, USA). The  
261 DCFDA fluorescence signals were measured at the 495nm excitation  
262 wavelength and 529nm emission wavelength.

263

### 264 **Enzyme Activity Assays**

265 The enzyme activities of GOT were measured using a Glutamate-  
266 Oxaloacetate Transaminase Activity Assay Kit (MAK055, Sigma-Aldrich; St.  
267 Louis, MO, USA) based on the manufacturer's protocol. In brief,  $1 \times 10^6$  cells  
268 were homogenized in 200  $\mu$ L ice-cold AST Assay Buffer. After removing the  
269 insoluble material by centrifuging at 13000g for 10 minutes, the samples were  
270 incubated at 37°C for 2 minutes while protected from light. The absorbance at  
271 450 nm was monitored every five minutes using the Cytation 3 Cell Imaging  
272 Multi-Mode Reader. To determine the GOT activity in MC3138-treated tumor  
273 tissues, 50 mg tumor tissues from control and MC3138-treated groups were  
274 ground into powder under with liquid nitrogen. Then the tumor tissue powder  
275 was homogenized in 200  $\mu$ L of ice-cold AST Assay Buffer by vortex. Samples  
276 were centrifuged at 13,000g for 10 minutes to remove the insoluble material.  
277 20  $\mu$ L of samples were used for the GOT activity test as above. The enzyme  
278 activity of GLS and GLUD1 were determined by the Glutaminase Assay Kit  
279 (catalog #E-133, Biomedical Research Service Center; Buffalo, NY, USA) and  
280 Glutamate Dehydrogenase Assay Kit (catalog #E-123, Biomedical Research  
281 Service Center; Buffalo, NY, USA) respectively according to the manufacturer's  
282 instructions. Briefly,  $1 \times 10^6$  cells were homogenized and then mixed with 100  
283  $\mu$ L ice-cold 1X cell lysis Solution. Then the lysate was incubated on ice for five  
284 minutes with gentle agitation. After removing the insoluble material by  
285 centrifuging at 14,000 rpm for five minutes, the supernatant was incubated at  
286 37°C for one hour, protected from light. The optical density values at 492 nm  
287 were measured by the Cytation 3 Cell Imaging Multi-Mode Reader. The  
288 indicated enzyme activity was calculated using the above optical density value  
289 data according to the manufacturer's instruction.

290

### 291 **Mass Spectrometric Metabolomics Analysis**

292 For metabolite extraction, PDAC cells were cultured in 6 cm cell culture  
293 dishes (Corning, USA) and fresh cell culture medium was added two hours prior

294 to the metabolite extraction. Cells were washed twice with ice-cold PBS, and  
295 then polar metabolites were extracted by adding cold 80% methanol/water (v/v,  
296 -80°C). The lysates were centrifuged for 10 minutes at 13,500g. Next, the  
297 supernatant was evaporated using the SpeedVac Vacuum Concentrator  
298 (Thermo Fisher Scientific; Waltham, MA, USA). Lyophilized concentrates were  
299 dissolved using equal volume LC-MS-grade water and then analyzed by liquid  
300 chromatography tandem mass spectrometry (LC-MS/MS) using the selected  
301 reaction monitoring (SRM) method <sup>5</sup>. Peak areas were integrated using Skyline  
302 software <sup>6</sup> and normalized by cell number from parallel plates and the internal  
303 control. The normalized peak areas values were subjected to pathway  
304 enrichment and relative quantification analyses using Metaboanalyst 3.0 <sup>7</sup>. For  
305 uniform <sup>13</sup>C-labeled glutamine ([U-<sup>13</sup>C<sub>5</sub>] glutamine) based flux analysis, PDAC  
306 cells were grown to around 80% confluence in complete cell culture media.  
307 Next, the complete medium was replaced by the glutamine/glucose-free DMEM  
308 supplemented with 10% dialyzed FBS, 25 mM unlabeled glucose (Sigma-  
309 Aldrich; St Louis, MO, USA), and 2 mM [U-<sup>13</sup>C<sub>5</sub>] glutamine (Cambridge Isotope  
310 Laboratories; Tewksbury, MA, USA) at indicated time point. Metabolites were  
311 extracted and analyzed by LC-MS/MS analysis using SRM method.

312

### 313 **Lentivirus Transfection**

314 Stable short hairpin RNA (shRNA) targeting SIRT5, GOT1, and GOT2 were  
315 obtained from Sigma-Aldrich. The plasmids overexpressing SIRT5 and the  
316 corresponding empty-vector pLX304 were purchased from DNASU Plasmid  
317 Repository (Arizona State University, Tempe, AZ, USA). CRISPR sgRNA  
318 targeting control or different regions of GOT1 were purchased from Applied  
319 Biological Materials Inc (Richmond, BC, Canada). Lentivirus was produced by  
320 transfecting HEK293T cells with the desired plasmid and packaging constructs  
321 using Turbofect. Cells were infected by the lentivirus with polybrene and then  
322 selected with the indicated antibiotics. For CRISPR sgRNA-mediated knockout,  
323 a single colony was isolated and propagated.

324

### 325 **Sirtuins Deacetylase Activity Assay**

326 Sirtuins deacetylase activity was measured using the SIRT1, SIRT3, and  
327 SIRT5 Deacetylase Fluorimetric Activity Assay Kit (#ab156065, #ab156067,  
328 #ab210074, Abcam) according to the manufacturer's guidelines. In brief, the  
329 indicated sirtuin activators were co-incubated with Fluoro-Substrate Peptide,  
330 NAD<sup>+</sup>, developer, and recombinant sirtuin enzymes at 37°C for 30 min. The  
331 fluorescent intensity was detected using a BioTek Cytation 3 plate reader  
332 (BioTek Instruments; Winooski, VT, USA) at 350 nm/450 nm (for SIRT1 and  
333 SIRT3 activity assay) and 480 nm/530 nm (SIRT5 activity assay).

334

### 335 **Synthesis of MC3138**

336 The compound MC3138 (compound “7o” in previous literature) was  
337 prepared in the Mai’s lab. The detailed synthetic procedure has been previously  
338 described <sup>8</sup>.

339

#### 340 **Docking of MC3138 with SIRT5**

341 Sirt5 (PDB ID: 2B4Y) was retrieved from Protein Data Bank and MC3138  
342 was prepared by downloading the 2D structure (PubChem CID 155524917) in  
343 SDF format from Pubchem followed by conversion to 3D. The docking study  
344 was carried out with AutoDock 4.2.6 (Scripps Research Institute). Visual  
345 analysis of complex of MC3138 in the active centers of the Sirt5 (PDB ID: 2B4Y)  
346 was performed using the Discovery Studio Visualizer (Figure 7a). The complex  
347 showed a binding energy of  $-7.1$  kcal/mol.

348

#### 349 **MC3138 Pharmacokinetics**

350 For pharmacokinetics analysis of MC3138, C57BL/6J mice were intra-  
351 peritoneally injected with a single dose of MC3138 [diluted in DMSO (1): corn  
352 oil (9) solution, 200 mg/kg]. Mice were euthanized at indicated time points (0.5  
353 h, 1 h, 3 h, 7 h, 12 h, 24 h, 48 h) to collect plasma and organs with n=4 for each  
354 time point. For MC3138 extraction, 50  $\mu$ L plasma was mixed with 2 mL acetone  
355 and vortexed thoroughly for 3 min. Samples were then centrifuged at 3500 rpm  
356 for 10 min. The supernatant was transferred into a new tube and evaporated  
357 using a SpeedVac. The dried extract was reconstituted in 50  $\mu$ L methanol and  
358 diluted with water into a final composition of 10% methanol, then purified by  
359 strata-x polymeric reverse phase columns (88-S100-UBJ Phenomenex), using  
360 an activation procedure consisting of consecutive washes with 3 mL of 100%  
361 methanol followed by 3 mL of water. After the samples were loaded into the  
362 column, 2 mL 50% methanol was used to wash out the contamination, and 2.5  
363 mL methanol was then used to elute the drug. The eluent was transferred into  
364 autoinjector sample vials for LC-MS/MS analysis. LC-MS/MS analysis was  
365 performed with Waters ACQUITY UPLC systems connected to a Xevo TQ-S  
366 mass spectrometry using Multiple Reaction Monitoring (MRM) transitions  
367 436.1888->104.8490 and 436.1888->390.1448. Chromatographic separation  
368 was performed on a Waters UPLC BEH C18 column (2.1 $\times$ 100 mm, 1.7  $\mu$ m)  
369 with a gradient of solvents A (methanol) and solvents B (water). The gradient  
370 was as follows: 0 min, 50% A, 10 min, 80% A, 15 min, 80% A, 16 min 50% A,  
371 20 min, and 50% A.

372 To determine the concentration of MC3138 in tumor tissues, MC3138 was  
373 extracted from 50 mg tumor tissues from MC3138-treated and control groups.  
374 In brief, tumor tissues were ground into powder while cooling in liquid nitrogen.  
375 Then the powder was mixed with 2 mL acetone and vortexed thoroughly for 3  
376 min. Samples were then centrifuged at 3500 rpm for 10 min. The supernatant  
377 was transferred into a new tube and evaporated using a SpeedVac. The dried

378 extract was reconstituted in 50  $\mu$ L methanol and diluted with water into a final  
379 composition of 10% methanol, then purified by strata-x polymeric reverse  
380 phase columns (88-S100-UBJ Phenomenex), using an activation procedure  
381 consisting of consecutive washes with 3 mL of 100% methanol followed by 3  
382 mL of water. After the samples were loaded into the column, 2 mL 50%  
383 methanol was used to wash out the contamination, and 3 mL methanol was  
384 then used to elute the drug. The eluent was transferred into autoinjector sample  
385 vials for LC-MS/MS analysis. LC-MS/MS analysis was performed with Waters  
386 ACQUITY UPLC systems connected to a Xevo TQ-S mass spectrometry using  
387 Multiple Reaction Monitoring (MRM) transitions 436.1888->104.8490 and  
388 436.1888->390.1448. Chromatographic separation was performed on a Waters  
389 UPLC BEH C18 column (2.1 $\times$ 100 mm, 1.7  $\mu$ m) with a gradient of solvents A  
390 (methanol) and solvents B (water). The gradient was as follows: 0 min, 50% A,  
391 10 min, 80% A, 15 min, 80% A, 16 min 50% A, 20 min, and 50% A.

392

### 393 **Statistical Analysis**

394 All data are shown as mean  $\pm$  standard deviation (SD) from at least three  
395 independent experiments except when indicated. Log-rank tests and Kaplan-  
396 Meier method were used to perform survival analysis. The  $\chi^2$  test or Fisher's  
397 Exact test was used to analyze the qualitative variables of clinicopathological  
398 data. Univariate and multivariate Cox proportional hazards regression were  
399 used to evaluate the prognostic factors in the PDAC patients. The statistical  
400 analyses between the two groups were performed by two-tailed Student's t-test.  
401 The statistical difference between multiple groups was conducted using one-  
402 way ANOVA with Bonferroni's post hoc analysis or Tukey's post hoc analysis.  
403 The correlation analysis was conducted using the Pearson's correlation test. All  
404 statistical analysis was performed using GraphPad Prism (Version 6) and  
405 SPSS 22.0. Statistical analyses were two-tailed and used an alpha of 0.05 for  
406 these tests. All quantitative *in vitro* experiments were repeated at least three  
407 times in triplicates.

408

### 409 **Supplementary References**

- 410 1. **Boj SF, Hwang CI, Baker LA**, et al. Organoid models of human and  
411 mouse ductal pancreatic cancer. *Cell* 2015;160:324-38.
- 412 2. Schmittgen TD, Livak KJ. Analyzing real-time PCR data by the  
413 comparative C(T) method. *Nat Protoc* 2008;3:1101-8.
- 414 3. Chaika NV, Yu F, Purohit V, et al. Differential expression of metabolic  
415 genes in tumor and stromal components of primary and metastatic loci  
416 in pancreatic adenocarcinoma. *PLoS One* 2012;7:e32996.
- 417 4. Abrego J, Gunda V, Vernucci E, et al. GOT1-mediated anaplerotic  
418 glutamine metabolism regulates chronic acidosis stress in pancreatic  
419 cancer cells. *Cancer Lett* 2017;400:37-46.

- 420 5. Gunda V, Yu F, Singh PK. Validation of Metabolic Alterations in  
421 Microscale Cell Culture Lysates Using Hydrophilic Interaction Liquid  
422 Chromatography (HILIC)-Tandem Mass Spectrometry-Based  
423 Metabolomics. PLoS One 2016;11:e0154416.
- 424 6. MacLean B, Tomazela DM, Shulman N, et al. Skyline: an open source  
425 document editor for creating and analyzing targeted proteomics  
426 experiments. Bioinformatics 2010;26:966-8.
- 427 7. Xia J, Sinelnikov IV, Han B, et al. MetaboAnalyst 3.0--making  
428 metabolomics more meaningful. Nucleic Acids Res 2015;43:W251-7.
- 429 8. Valente S, Mellini P, Spallotta F, et al. 1,4-Dihydropyridines Active on  
430 the SIRT1/AMPK Pathway Ameliorate Skin Repair and Mitochondrial  
431 Function and Exhibit Inhibition of Proliferation in Cancer Cells. J Med  
432 Chem 2016;59:1471-91.

433 Author names in bold designate shared co-first authorship.

434

435

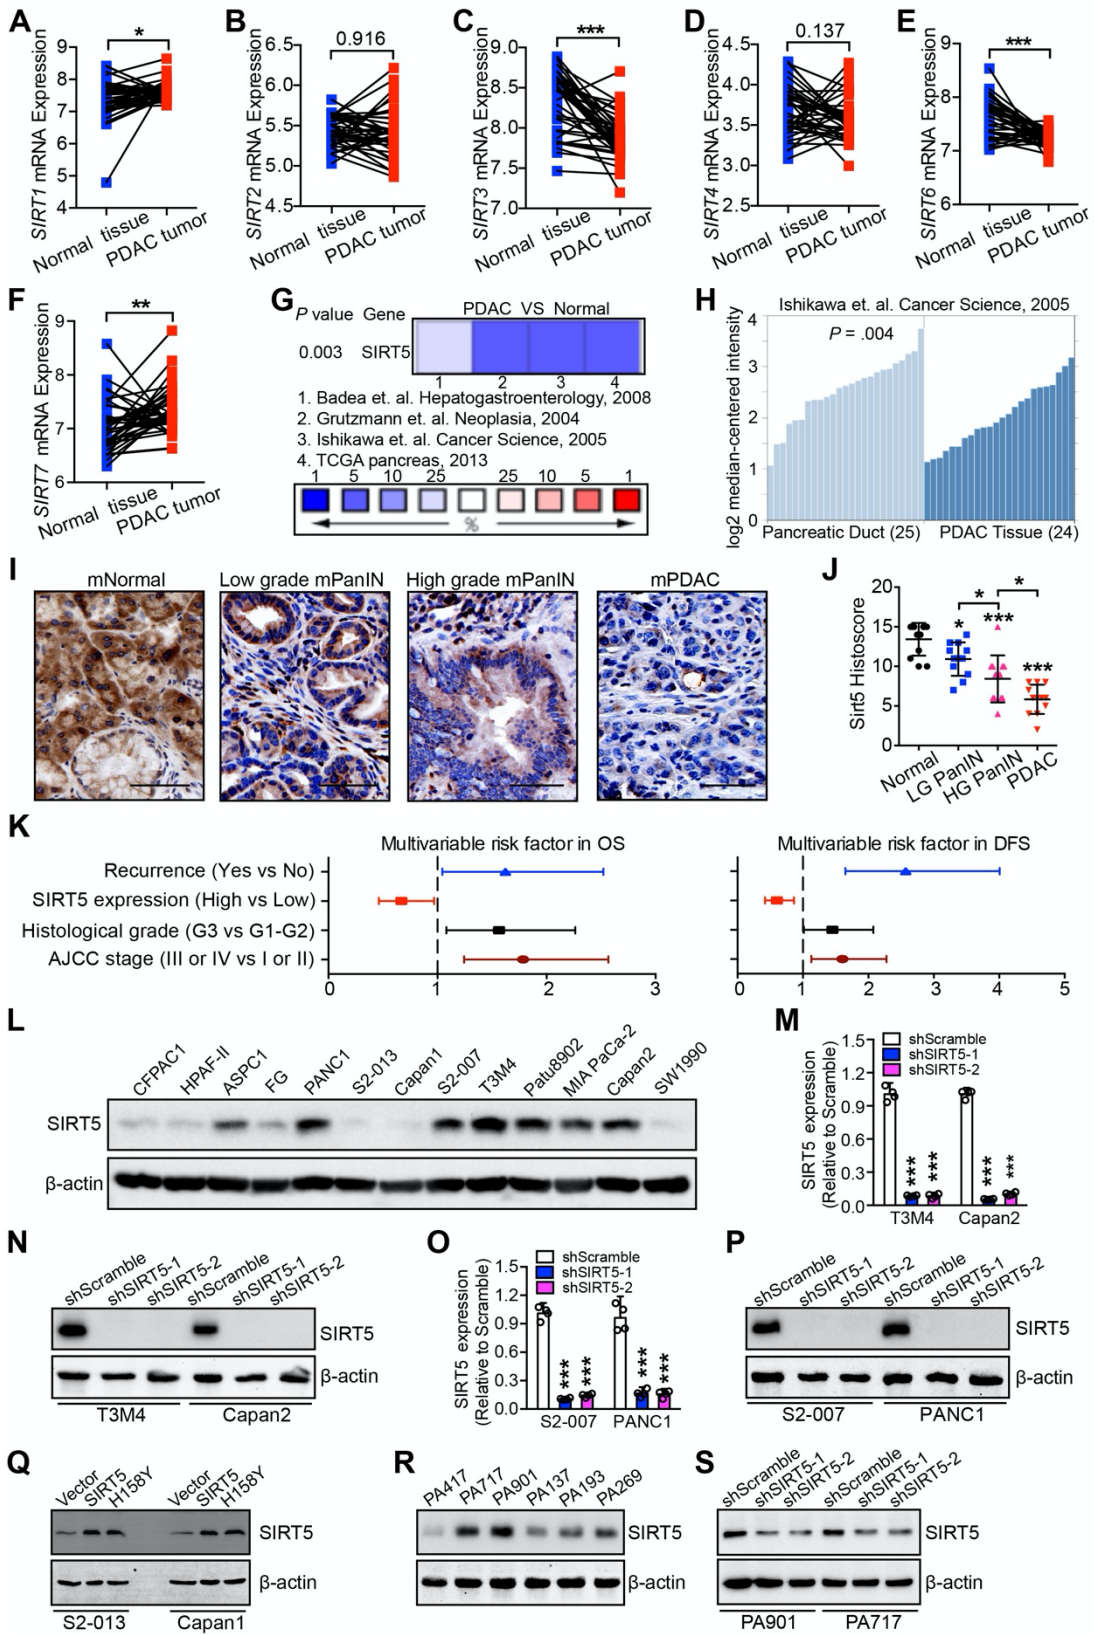

437

438

439

**Figure S1.** SIRT5 downregulation in PDAC correlates with disease progression, poor survival outcomes, and enhanced tumor cell growth.



440 (A-F). The mRNA levels of *SIRT1-7* in pancreatic cancer tissues and the paired  
441 adjacent normal tissues from GEO database (GDS4103, n = 39).  
442 (G-H). *SIRT5* mRNA is downregulated in pancreatic cancer tissues among  
443 various cohorts from the Oncomine database (<https://www.oncomine.org>). The  
444 representative scatter plot of *SIRT5* mRNA level from the Ishikawa cohort (H).  
445 (I-J). IHC staining (I) and quantification (J) for *SIRT5* expression in normal  
446 acinar cells from control mice and low-grade (LG) PanINs, high-grade (HG)  
447 PanINs, and pancreatic tumors from KPC mice. Scale bar represents 100  $\mu$ m.  
448 (K). Multivariate regression analysis of the overall survival and disease-free  
449 survival in PDAC patient cohort from Shanghai Outdo Biotech Tissue Bank  
450 (Bars indicate 95% confidence intervals).  
451 (L). Immunoblotting for *SIRT5* expression in thirteen pancreatic cancer cell lines.  
452 (M-P). qRT-PCR and immunoblotting for *SIRT5* expression in control and  
453 *SIRT5*-knockdown PDAC cells.  
454 (Q). Immunoblotting for *SIRT5* expression in control, *SIRT5*-overexpressing  
455 and *SIRT5*H158Y-overexpressing PDAC cells.  
456 (R). Immunoblotting for *SIRT5* expression in six human PDAC organoids.  
457 (S). Immunoblotting of *SIRT5* expression levels in the control and *SIRT5*-  
458 knockdown PDAC organoids.  
459 For all *in vitro* studies  $n \geq 3$ . The data are represented as mean  $\pm$  SD. The  
460 statistics is calculated by paired Student's t-test (A-F). The cohorts were  
461 compared with the control group by one-way ANOVA with Bonferroni's post hoc  
462 analysis (M, O) or compared with every other group by one-way ANOVA with  
463 Tukey's post hoc analysis (J), \* $P < .05$ , \*\* $P < .01$ , and \*\*\* $P < .001$ .  
464

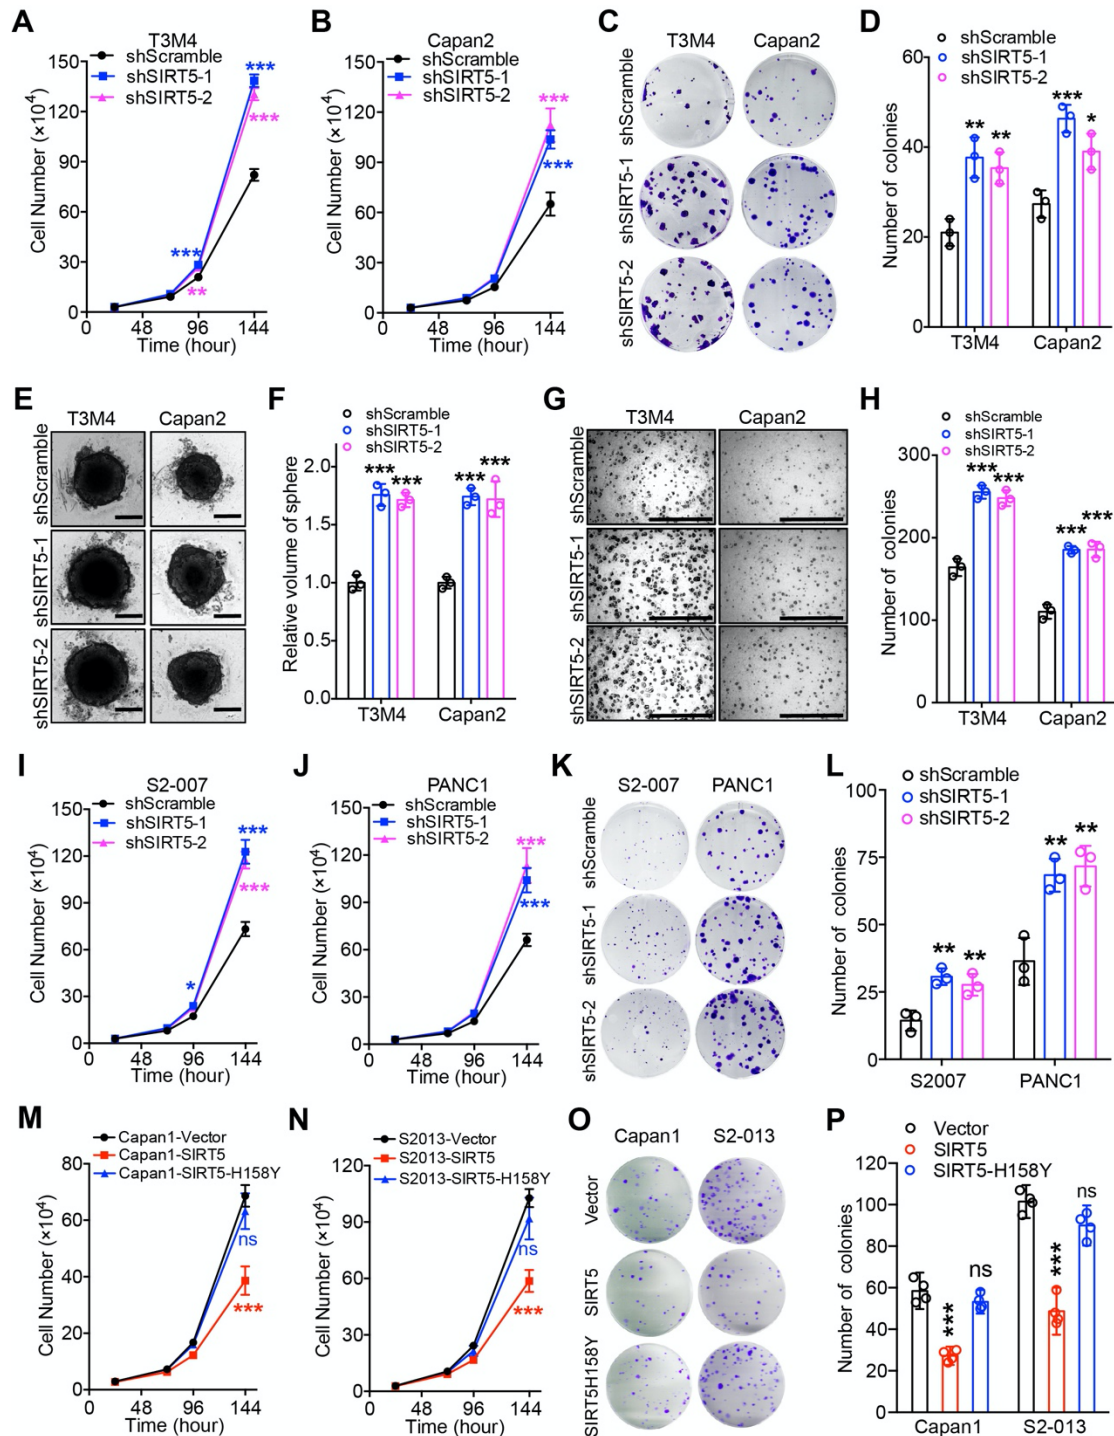

465

466

**Figure S2. SIRT5 inhibits pancreatic cancer cell growth *in vitro*.**

467

(A-B). The cell growth curve of control and *SIRT5*-knockdown T3M4 and Capan2 PDAC cells.

468

(C-D). Representative images and quantitation of colony formation assay in control and *SIRT5*-knockdown T3M4 and Capan2 PDAC cells.

470

(E-F). Sphere formation assay with control and *SIRT5*-knockdown T3M4 and

471

Capan2 PDAC cells that were grown in 96-well low attachment plates for 15

472

473 days. Images were captured by Cytation 3 and sphere volume was calculated  
474 by  $V=4*\pi r^3/3$ . Scale bar represents 300  $\mu\text{m}$ .  
475 (G-H). Representative images and quantitation of colonies in soft agar colony  
476 formation assays for control and *SIRT5*-knockdown T3M4 and Capan2 PDAC  
477 cells. Scale bar represents 1000  $\mu\text{m}$ .  
478 (I-J). Growth rates of control and *SIRT5*-knockdown PANC1 and S2-007 PDAC  
479 cells.  
480 (K-L). Representative images and quantitation of the colony formation assay in  
481 control and *SIRT5*-knockdown PANC1 and S2-007 PDAC cells.  
482 (M-N). Growth rates of control, *SIRT5*-overexpressing and SIRT5H158Y-over  
483 expressing cells (Capan1 and S2-013).  
484 (O-P). Representative images and quantitation of the colony formation assay  
485 in control, *SIRT5*-overexpressing and SIRT5H158Y-overexpressing cells  
486 (Capan1 and S2-013).  
487 For all *in vitro* studies  $n \geq 3$ . The data are represented as mean  $\pm$  SD. The  
488 cohorts were compared with the control group by one-way ANOVA with  
489 Bonferroni's post hoc analysis (D, F, H, L, P). Cohorts were compared with the  
490 control group by two-way ANOVA with Bonferroni's post hoc analysis (A, B, I,  
491 J, M, N), \* $P < .05$ , \*\* $P < .01$ , and \*\*\* $P < .001$ .  
492

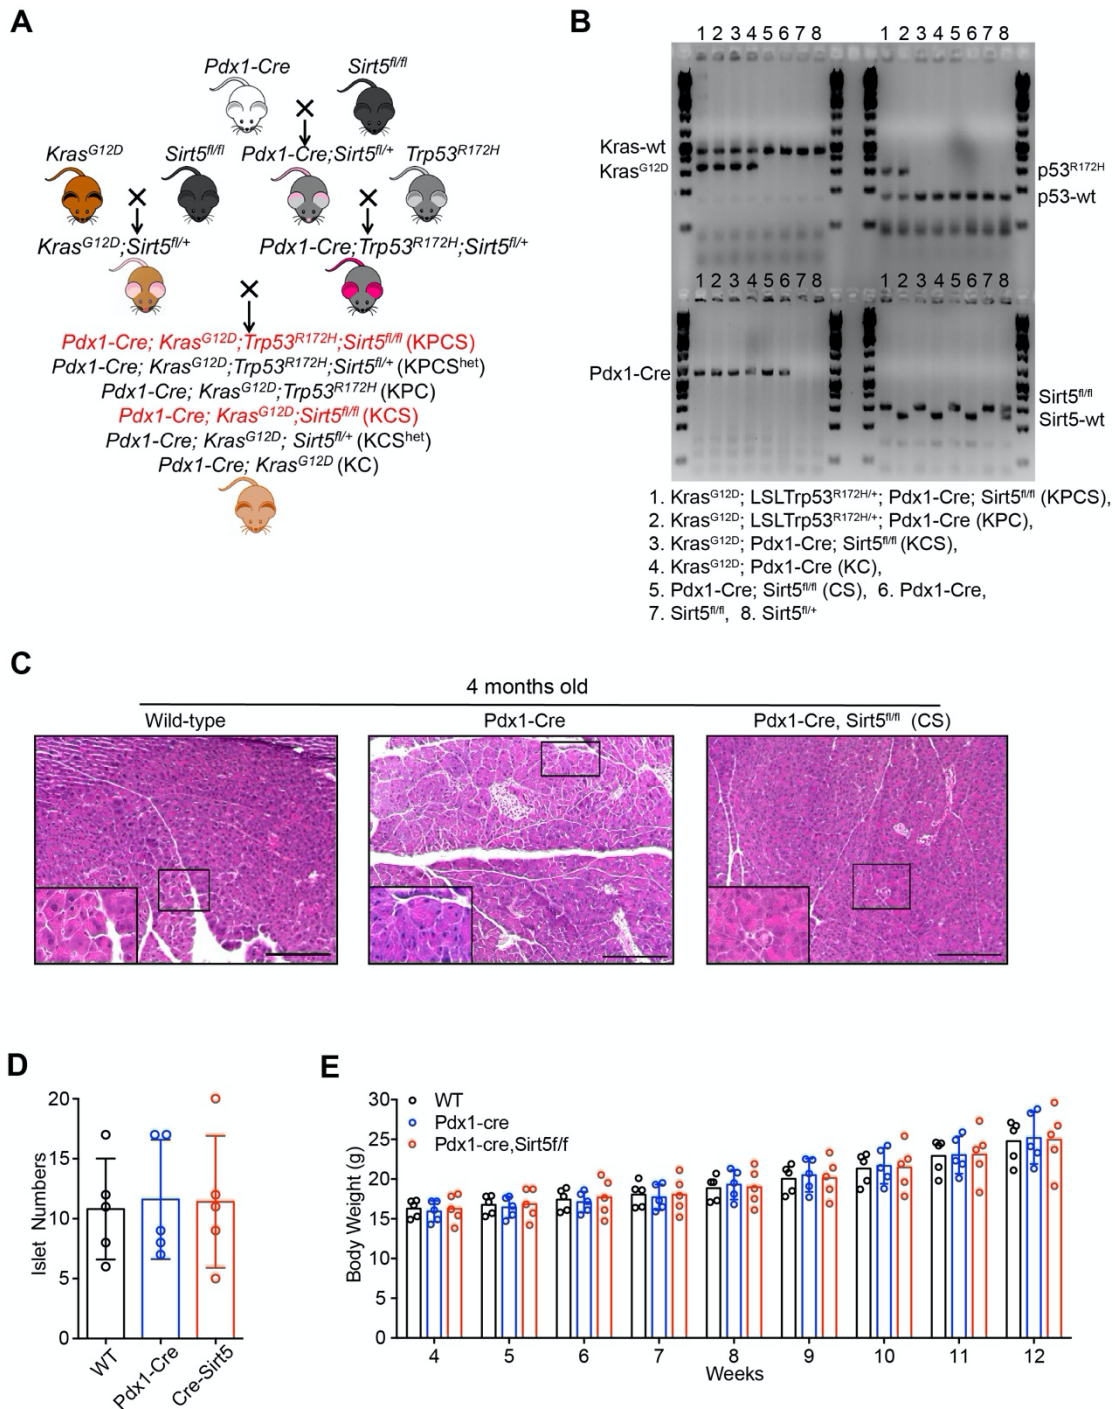

493

494 **Figure S3.** SIRT5 deficiency in murine pancreas does not display distinct  
 495 abnormalities.

496 All panels shown are age-matched wild-type C57 mice, *Pdx1-Cre* (Cre), and  
 497 *Pdx1-Cre, Sirt5<sup>fl/fl</sup>* (CS) littermate mice (n = 5, each group).

498 (A). *LSL-Kras<sup>G12D</sup>*, *LSL-Trp53<sup>R172H/+</sup>*, and *Pdx1-Cre* mice were crossed with  
 499 *Sirt5<sup>fl/fl</sup>* mice to obtain mice with *Kras<sup>G12D</sup>; Sirt5<sup>fl/+</sup>* (KS<sup>het</sup>) and *LSL-Trp53<sup>R172H/+</sup>;*  
 500 *Pdx1-Cre; Sirt5<sup>fl/fl</sup>* (PCS<sup>het</sup>) genotypes. Intercrossing of the KS<sup>het</sup> and PCS<sup>het</sup>  
 501 mice generated *LSL-Kras<sup>G12D</sup>; LSL-Trp53<sup>R172H/+</sup>; Pdx1-Cre; Sirt5<sup>fl/fl</sup>* (KPCS) and  
 502 *LSL-Kras<sup>G12D</sup>; LSL-Trp53<sup>R172H/+</sup>; Pdx1-Cre* (KPC) mice.

503 (B). Representative images depicting the genotyping results of tissues  
504 extracted from KPCS (lane 1), KPC (lanes 2), KCS (lane 3), KC (lane 4), CS  
505 (lane 5), *Pdx1-Cre* (lane 6), *Sirt5<sup>fl/fl</sup>* (lane 7), and *Sirt5<sup>fl/+</sup>* (lane 8) mice.

506 (C). Representative image of H&E stained pancreatic tissues from mice of  
507 indicated genotypes at 16 weeks of age. Scale bar is 200  $\mu$ m.

508 (D). Quantitation of the islet numbers in 16-week-old wild-type, *Pdx1-Cre*, and  
509 CS mice.

510 (E). Body weight in age-matched wild-type, *Pdx1-Cre*, and CS mice from age 4  
511 to 16 weeks.

512 The data are represented as mean  $\pm$  SD. The cohorts were compared with the  
513 wild type group by one-way ANOVA with Bonferroni's post hoc analysis (D).  
514 Cohorts were compared with every other group by two-way ANOVA with  
515 Tukey's post hoc analysis (E). Differences between each group (D-E) are not  
516 significant.

517



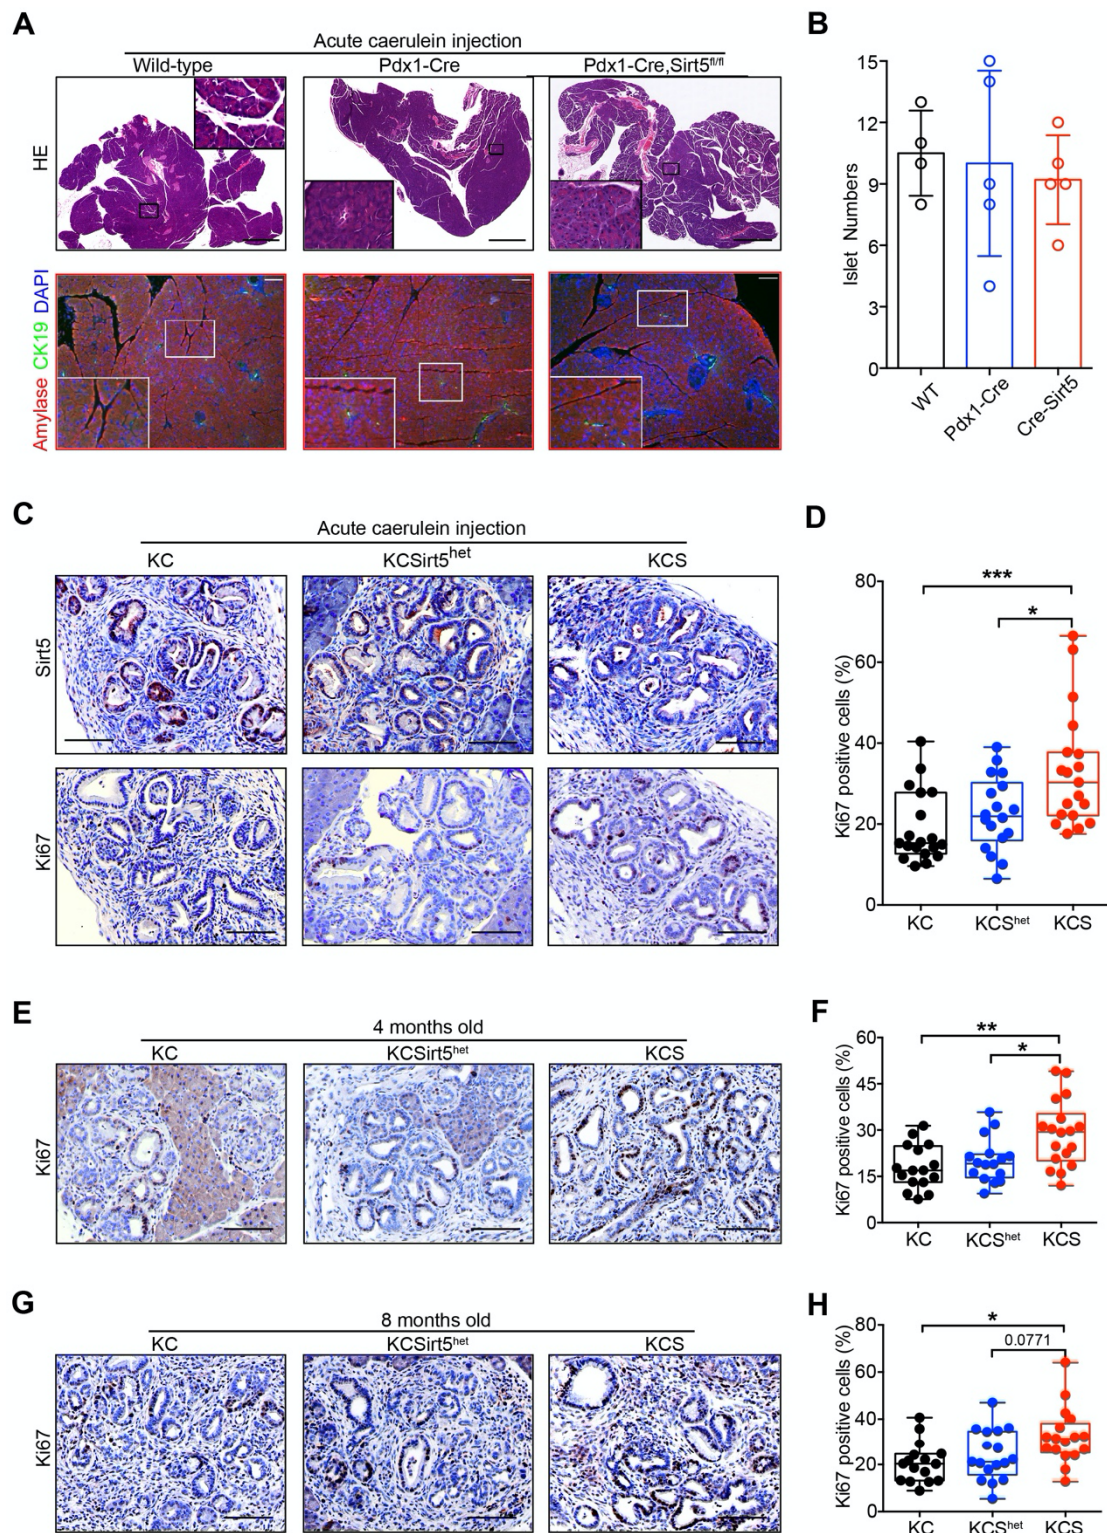

518

519 **Figure S4.** Sirt5 deficiency accelerates acinar-to-ductal metaplasia, PanIN  
 520 formation, and PDAC progression cooperated with oncogenic mutations.

521 (A). Representative image of H&E staining and CK19/Amylase immunofluorescence staining of pancreatic tissue from the indicated genotype mice receiving  
 522 two-days caerulein-injection. Scale bars: H&E 2000  $\mu$ m, immunofluorescence  
 523 100  $\mu$ m.

525 (B). Statistical analysis of the islet number in the age-matched wild-type, *Pdx1-*  
526 *Cre*, and CS mice receiving two-days caerulein-injection.  
527 (C). IHC staining images of SIRT5 and Ki67 in pancreatic tissue from caerulein-  
528 injected KC, KCS<sup>het</sup>, and KCS mice. Scale bars are 100 μm.  
529 (D). Quantification of Ki67 positive cells in pancreatic tissue from caerulein-  
530 injected KC, KCS<sup>het</sup>, and KCS mice.  
531 (E-F). IHC staining and quantification of Ki67 positive cells in pancreatic tissue  
532 from 4-month-old KC, KCS<sup>het</sup>, and KCS mice. Scale bars are 100 μm.  
533 (G-H). IHC staining and quantification of Ki67 positive cells in pancreatic tissue  
534 from 8-month-old KC, KCS<sup>het</sup>, and KCS mice. Scale bars are 100 μm.  
535 The data are represented as mean ± SD. The cohorts were compared with  
536 every other group by one-way ANOVA with Tukey's post hoc analysis (B, D, F,  
537 H), \**P*<.05, \*\**P*<.01, and \*\*\**P*<.001.  
538

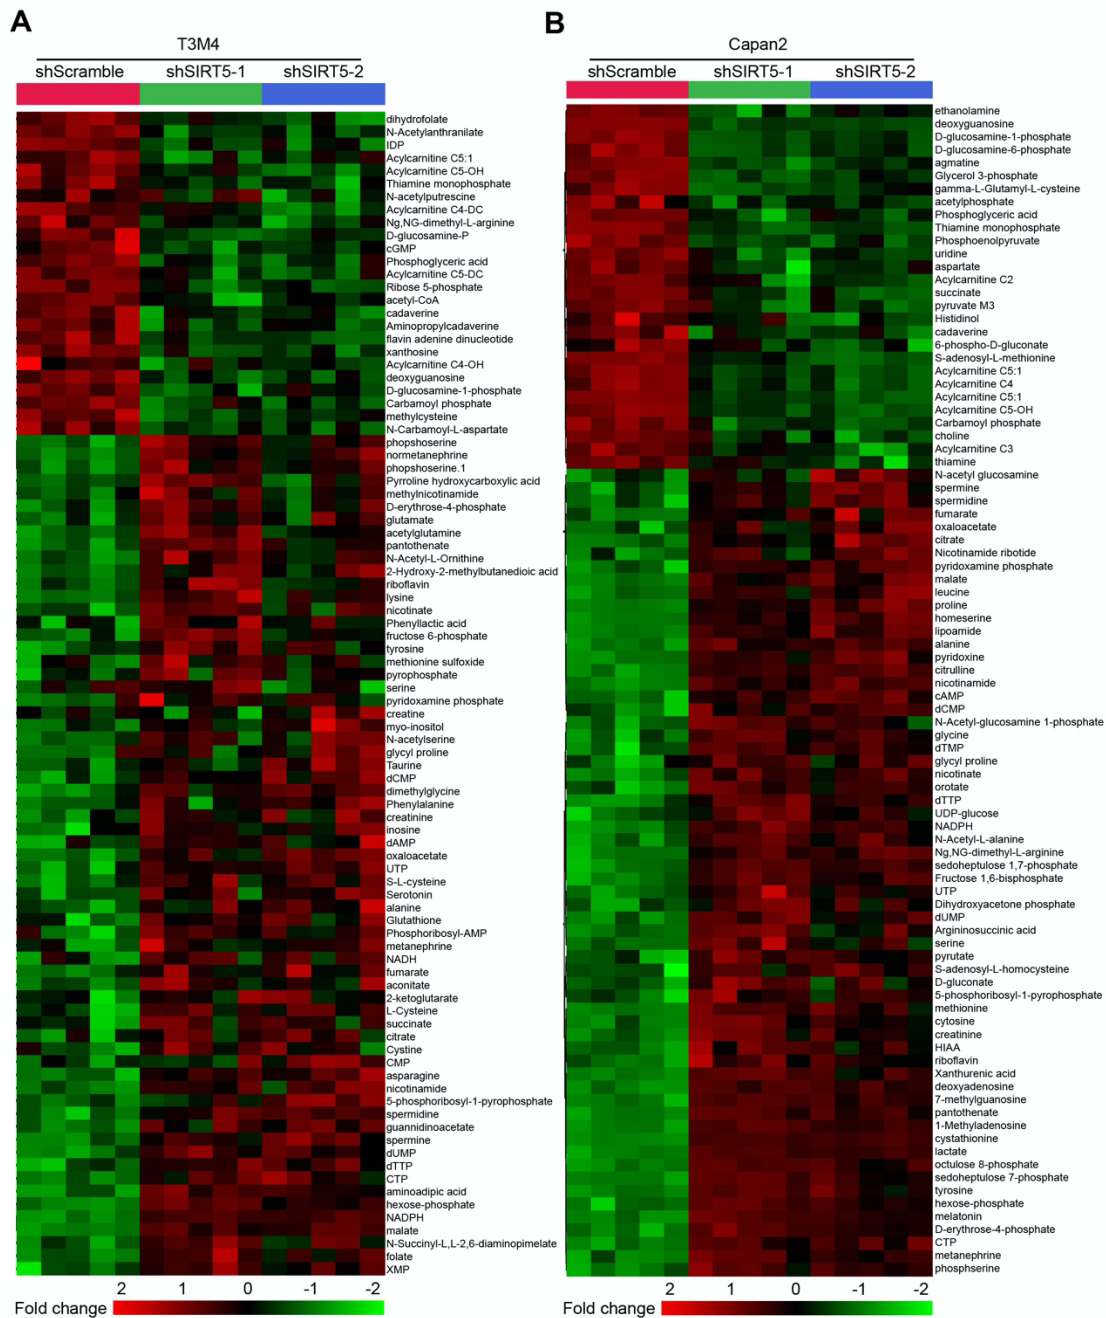

539

540

**Figure S5 related to Figure 4. SIRT5 suppresses glutamine and glutathione metabolism, and regulates cellular redox homeostasis.**

541

(A-B). The heatmap of significantly deregulated metabolites between control and *SIRT5*-knockdown PDAC cells (n= 5 samples for each group).

542

543

544



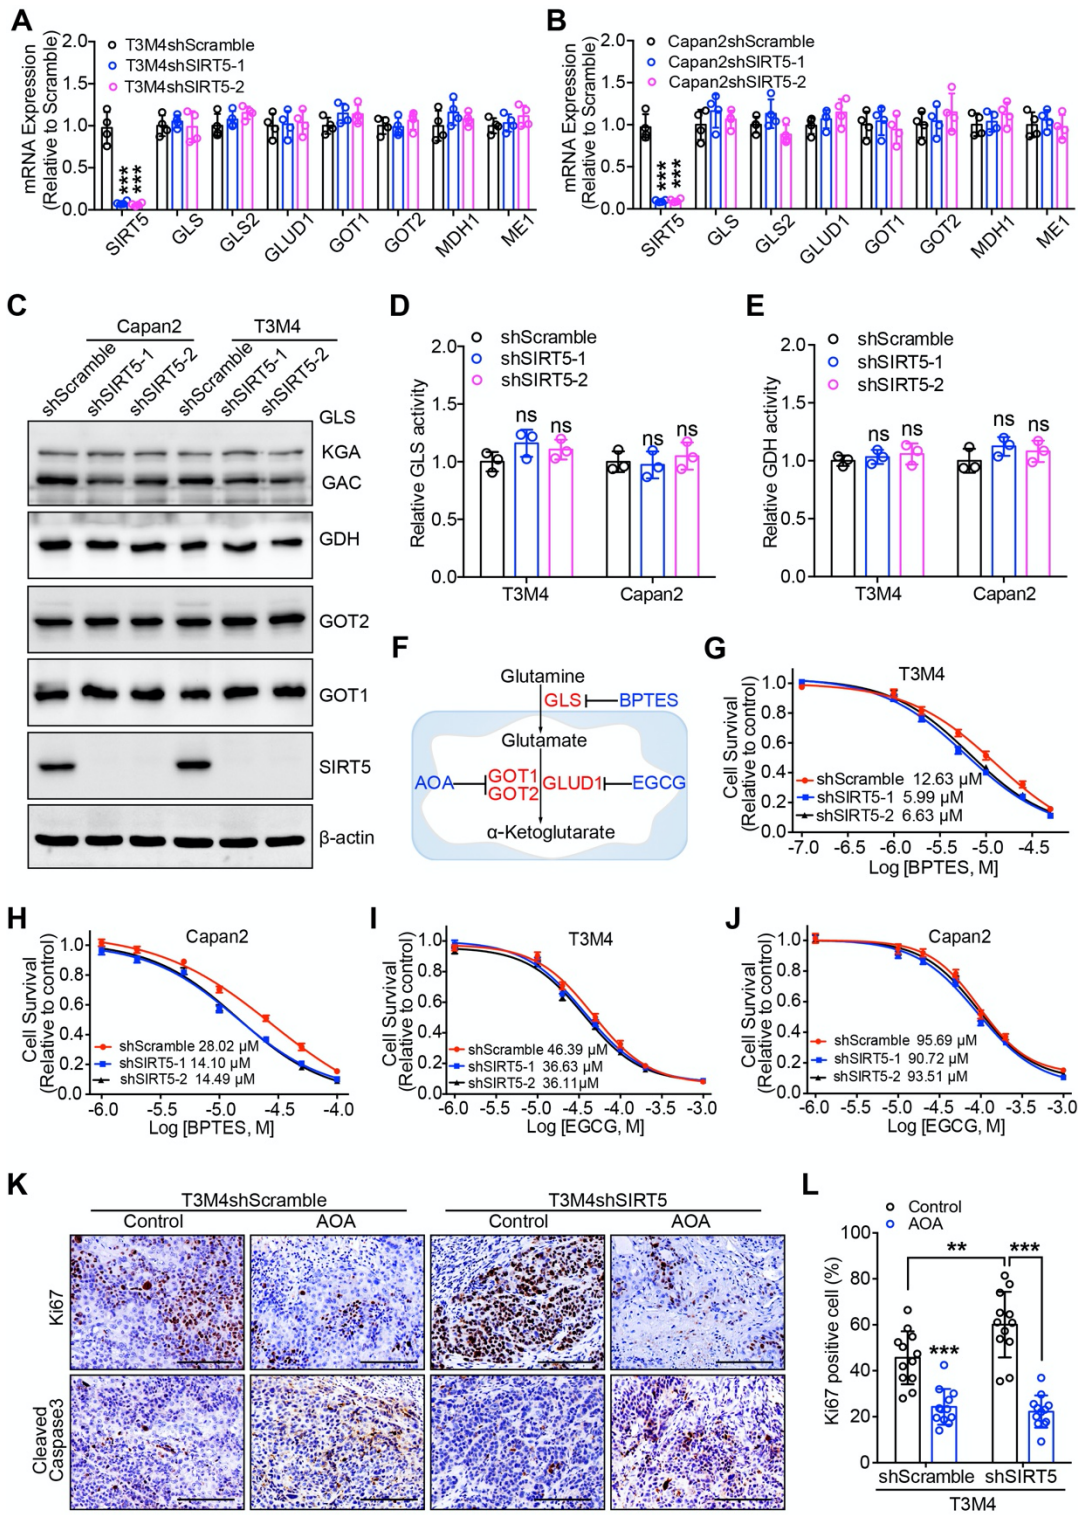

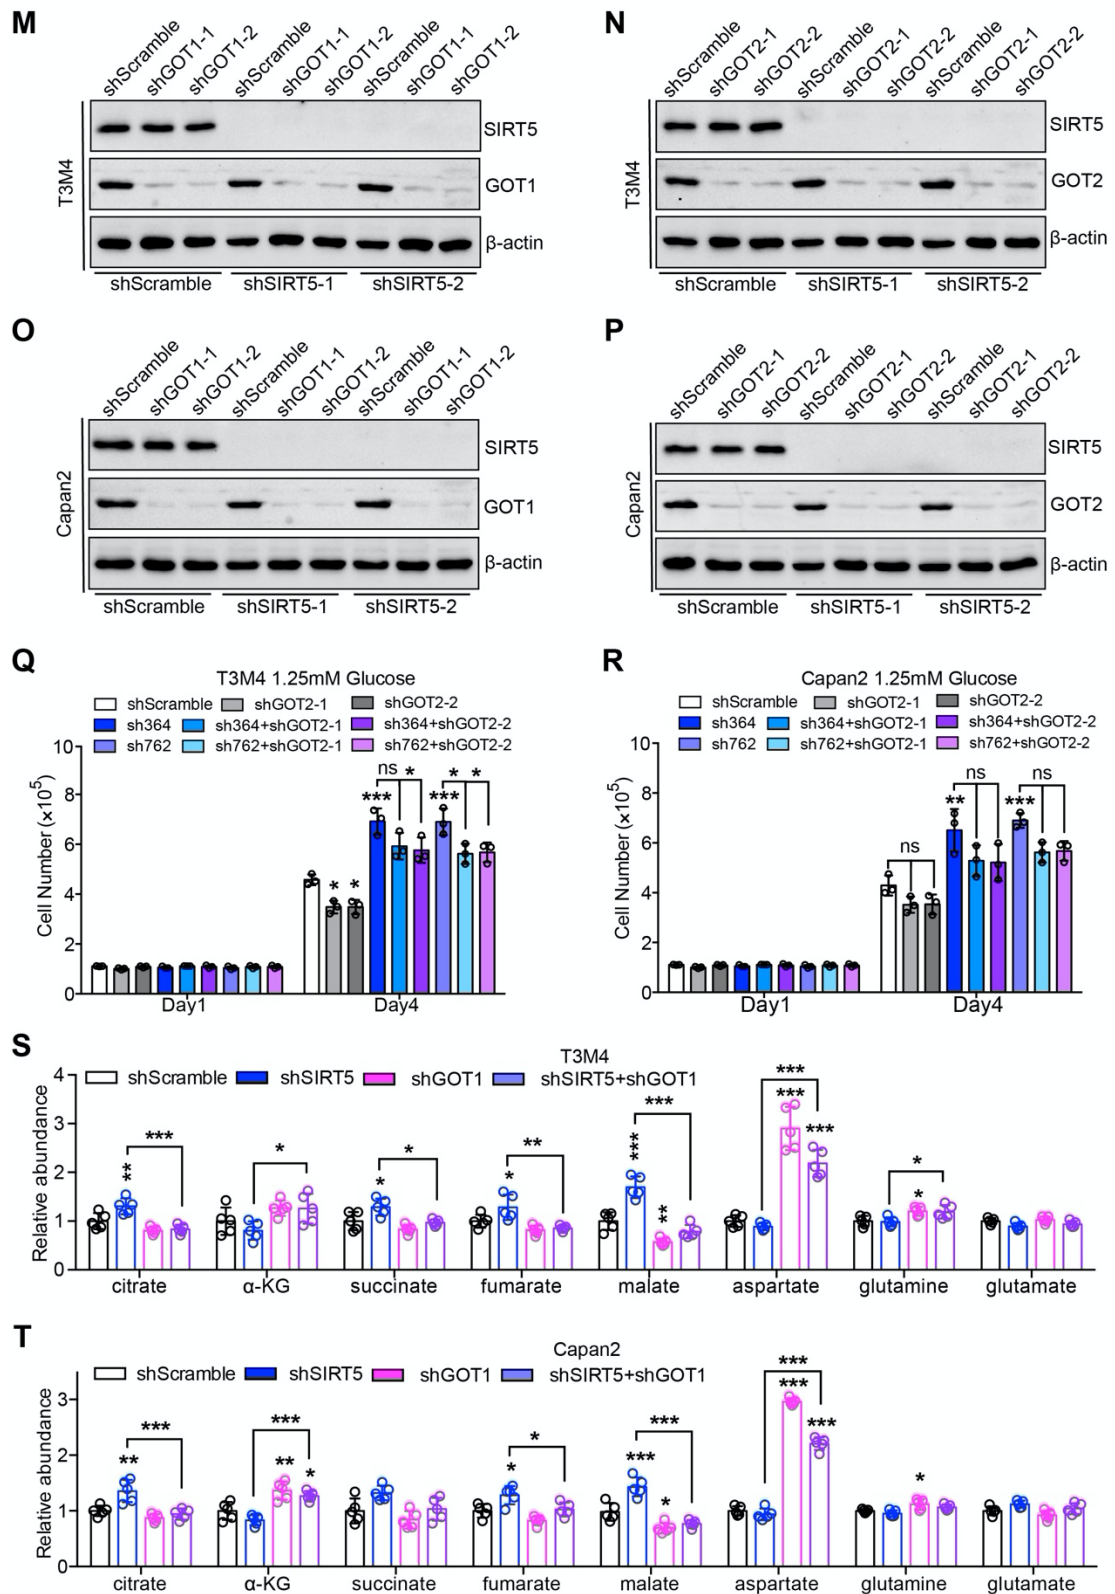

546

547 **Figure S6.** SIRT5 inhibits glutamine and glutathione metabolism by decreasing  
 548 GOT1 enzyme activity.

549 (A-B). The mRNA levels of enzymes involved in glutamine and glutathione  
 550 metabolism in control and *SIRT5*-knockdown PDAC T3M4 and Capan2 cells.

551 (C). The protein levels of enzymes involved in glutamine and glutathione  
552 metabolism from control and *SIRT5*-knockdown PDAC cells.

553 (D). The GLS enzyme activity was determined in T3M4 and Capan2 *SIRT5*-  
554 knockdown cells.

555 (E). The GDH (GLUD1) enzyme activity was determined in T3M4 and Capan2  
556 *SIRT5*-knockdown cells.

557 (F). A schematic depiction of the key enzymes in glutamine metabolism and the  
558 corresponding inhibitors. Bis-2-(5-phenylacetamido-1,3,4-thiadiazol-2-yl) ethyl  
559 sulfide (BPTES), epigallocatechin gallate (EGCG), and aminooxyacetate  
560 (AOA).

561 (G-H). Relative cell survival of control and *SIRT5*-knockdown cells treated with  
562 GLS inhibitor BPTES. Data are presented relative to the respective untreated  
563 control and *SIRT5*-knockdown cells.

564 (I-J). Relative cell survival of control and *SIRT5*-knockdown cells treated with  
565 GLUD1 inhibitor EGCG. Data are presented relative to the respective untreated  
566 control and *SIRT5*-knockdown cells.

567 (K-L). Ki67 IHC staining (K) and quantitation (L) in tumor sections from  
568 orthotopically implanted scrambled control and *SIRT5*-knockdown cells treated  
569 with saline control or AOA. Scale bars are 100  $\mu$ m.

570 (M-P). Western blotting to confirm *GOT1* and *GOT2* knockdown efficiency in  
571 scrambled control and *SIRT5*-knockdown cells.

572 (Q-R). Cell growth of scrambled control and *SIRT5*-knockdown cells  
573 transfected with scrambled control or *GOT2* shRNA under low glucose  
574 conditions (1.25 mM). Experiment for scrambled control and *SIRT5*-knockdown  
575 cells transfected with *GOT1* or *GOT2* shRNA were set up together.

576 (S-T). Relative levels of metabolites in glutamine and glutathione metabolism  
577 pathways from scrambled control and *SIRT5*-knockdown cells transfected with  
578 scrambled control or *GOT1* shRNA.

579 For all *in vitro* studies  $n \geq 3$ . The data are represented as mean  $\pm$  SD. Cohorts  
580 were compared with the control group by one-way ANOVA with Bonferroni's  
581 post hoc analysis (A, B, D, E) or compared with every other group by one-way  
582 ANOVA with Tukey's post hoc analysis (L, Q-T), \* $P < .05$ , \*\* $P < .01$ , and  
583 \*\*\* $P < .001$ .

584

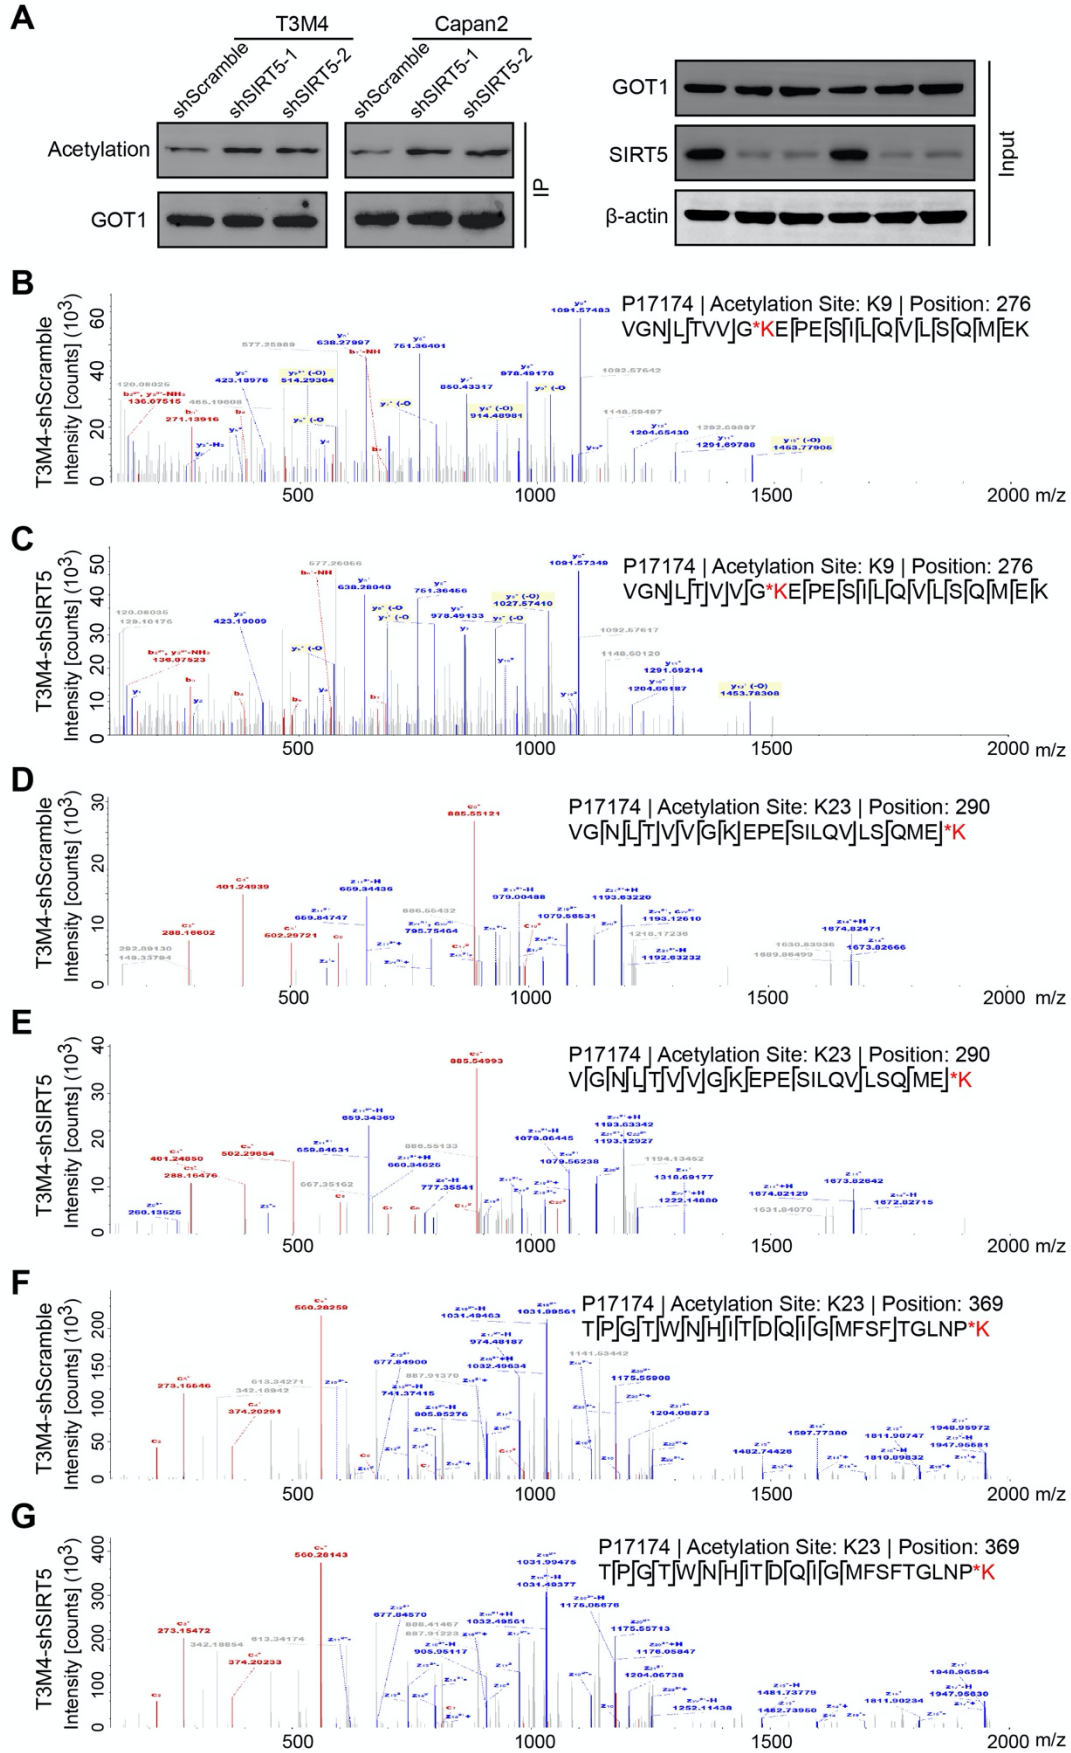

586 **Figure S7.** SIRT5 inhibits GOT1 enzymatic activity by catalyzing its lysine  
587 deacetylation.

588 (A). Endogenous GOT1 protein was immunoprecipitated from control and  
589 *SIRT5*-knockdown T3M4/Capan2 cells. The lysine acetylation level of GOT1  
590 was determined by western blotting. Input protein levels are shown on the right.

591 (B-G). Mass spectra demonstrating lysine acetylation sites in exogenously  
592 expressed GOT1 protein immunoprecipitated from scrambled control and  
593 *SIRT5*-knockdown T3M4 cells. The specific lysine acetylation sites were  
594 identified by the liquid chromatography-tandem mass spectrometry. The  
595 identified acetylated peptide ions in GOT1 protein are indicated.

596



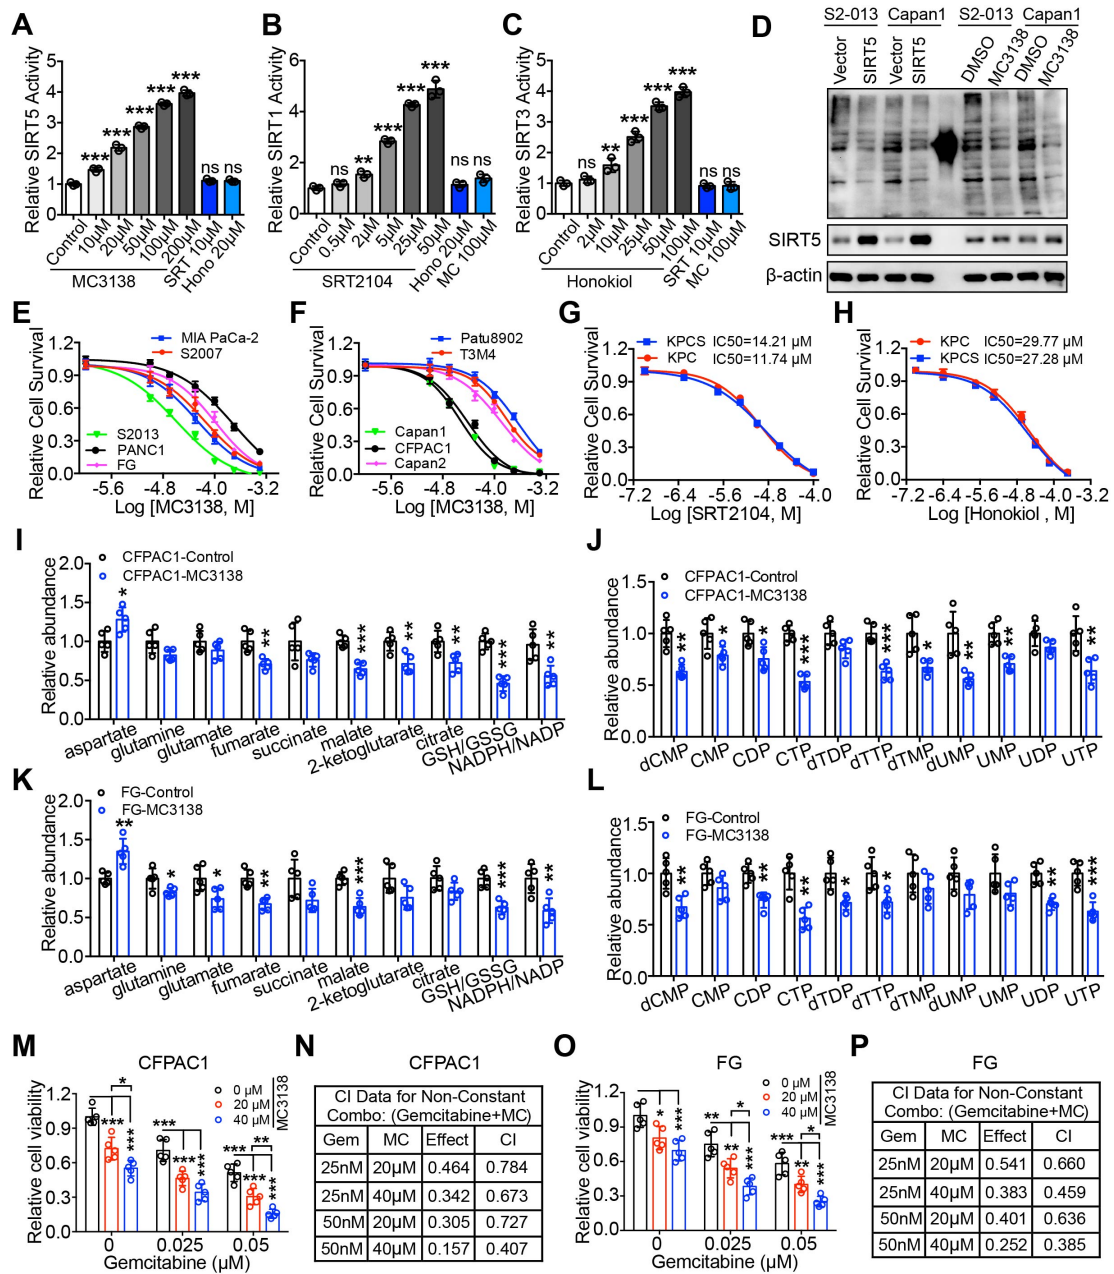

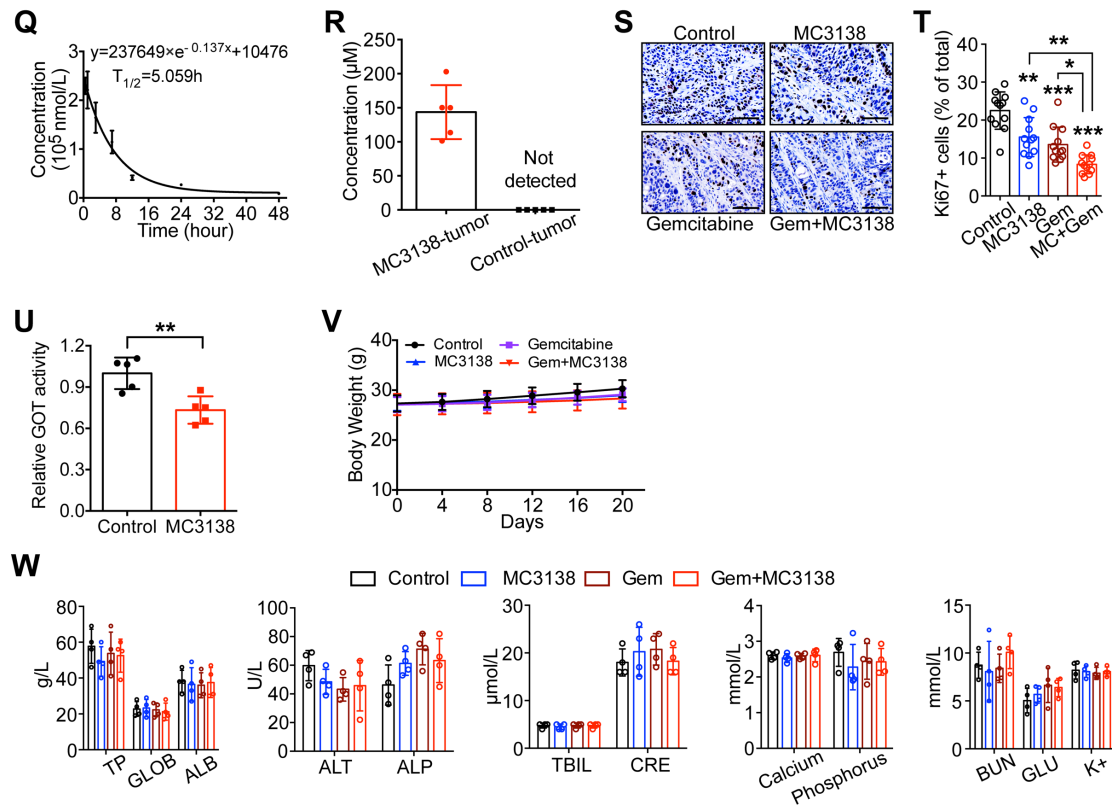

598

599 **Figure S8.** SIRT5 activator MC3138 exhibits anti-tumor effects and synergism  
600 with gemcitabine in human PDAC cells, organoids, and PDX models.

601 (A). Increased SIRT5 deacetylase activity by MC3138. SIRT5 deacetylase  
602 activity was measured under different concentrations of MC3138 using SIRT5  
603 Deacetylase Fluorometric Assay Kit. The selective SIRT1 activator SRT2104  
604 (SRT) and SIRT3 activator Honokiol (Hono) were used as negative controls.

605 (B-C). SIRT5 activator MC3138 does not increase SIRT1 and SIRT3  
606 deacetylase activities. SIRT1 and SIRT3 deacetylase activities were detected  
607 using SIRT1 and SIRT3 Deacetylase Fluorometric Assay Kits, respectively.  
608 The selective SIRT1 activator SRT2104 and SIRT3 activator Honokiol were  
609 used as positive controls.

610 (D). Immunoblotting to show the lysine acetylation level in control or *SIRT5*-  
611 overexpressing PDAC cells and PDAC cells treated with DMSO solvent control  
612 or 10  $\mu$ M SIRT5 activator MC3138 for 24 h.

613 (E-F). Relative cell survival of ten PDAC cell lines treated with different doses  
614 of MC3138.

615 (G-H). Relative cell survival of KPC cell line and *SIRT5*-knockout KPC cell line  
616 (KPCS) treated with different doses of SIRT1 activator SRT2104 and SIRT3  
617 activator Honokiol.

618 (I-L). Bar charts depicting the relative levels of metabolites in glutamine,  
619 glutathione and pyrimidine metabolism pathways in CFPAC1 and FG cells  
620 treated with MC3138 (CFPAC1: 20  $\mu$ M; FG: 50  $\mu$ M) for 24 h.

621 (M, O). Cell viability of CFPAC1 (M) and FG (O) cells treated with the indicated  
622 concentrations of gemcitabine and MC3138 for 72 h.  
623 (N, P). Combination index (CI) of gemcitabine and MC3138 at indicated  
624 concentrations was calculated using Compusyn software.  
625 (Q). MC3138 Pharmacokinetics: The plasma concentration-time curve of  
626 MC3138 after intraperitoneal injection of a single dose of MC3138 (200 mg/kg)  
627 (n = 4).  
628 (R). The concentration of MC3138 in tumor tissues from MC3138-treated  
629 PA137 PDX tumors.  
630 (S-W). Effect of MC3138 (MC) combined with Gemcitabine (Gem) on human  
631 PDX tumors. IHC staining of Ki67 (S) and quantitation (T). The relative GOT  
632 activity of control and MC3138-treated PA137 PDX tumors (U). The body  
633 weights of mice from each group at indicated time points (V). The blood  
634 biochemistry indices test results of mice from indicated groups by automatic  
635 biochemical analyzer (W). Scale bars are 100  $\mu$ m.  
636 For all *in vitro* studies  $n \geq 3$ . The data are represented as mean  $\pm$  SD. The  
637 cohorts were compared with the control group by one-way ANOVA with  
638 Bonferroni's post hoc analysis (A, B, C) or compared with every other group by  
639 one-way ANOVA with Tukey's post hoc analysis (M, O, T, W). Cohorts were  
640 compared with every other group by two-way ANOVA with Tukey's post hoc  
641 analysis (V). The statistics was calculated by Student's t-test (I, J, K, L, R, U),  
642 \* $P < .05$ , \*\* $P < .01$ , and \*\*\* $P < .001$ .  
643



644 **Table S1. Correlation between Expression of SIRT5 and**  
645 **Clinicopathological Features in PDAC Patients from Figure 1.**  
646

| Variables                       | Low SIRT5 | High SIRT5 | <i>p</i> value |
|---------------------------------|-----------|------------|----------------|
| Numbers                         | 73        | 70         |                |
| Gender                          |           |            | 0.161          |
| Male                            | 49 (67.1) | 39 (55.7)  |                |
| Female                          | 24 (32.9) | 31 (44.3)  |                |
| Median age                      |           |            | 0.801          |
| <62 years                       | 37 (50.7) | 34 (48.6)  |                |
| ≥62 years                       | 36 (49.3) | 36 (51.4)  |                |
| pT stage                        |           |            | 0.160          |
| T1-T2                           | 44 (60.3) | 50 (71.4)  |                |
| T3-T4                           | 29 (39.7) | 20 (28.6)  |                |
| pN stage                        |           |            | 0.145          |
| N0                              | 36 (49.3) | 43 (61.4)  |                |
| N1-N2                           | 37 (50.7) | 27 (38.6)  |                |
| pM stage <sup>a</sup>           |           |            | 0.962          |
| M0                              | 71 (97.3) | 67 (95.7)  |                |
| M1                              | 2 (2.7)   | 3 (4.3)    |                |
| TNM stage                       |           |            | 0.148          |
| I- II                           | 35 (47.9) | 42 (60.0)  |                |
| III- IV                         | 38 (52.1) | 28 (40.0)  |                |
| Histological grade <sup>b</sup> |           |            | 0.659          |
| G1                              | 7 (9.6)   | 11 (15.7)  |                |
| G2                              | 40 (54.8) | 34 (48.6)  |                |
| G3                              | 26 (35.6) | 25 (35.7)  |                |
| Tumor size (cm)                 |           |            | 0.765          |
| ≤4                              | 42 (57.5) | 42 (60.0)  |                |
| >4                              | 31 (42.5) | 28 (40.0)  |                |
| Recurrence                      |           |            | 0.033          |
| YES                             | 55 (75.3) | 41 (58.6)  |                |
| NO                              | 18 (24.7) | 29 (41.4)  |                |
| CEA (ng/mL)                     |           |            | 0.339          |
| <5                              | 38 (52.1) | 42 (60.0)  |                |
| ≥5                              | 35 (47.9) | 28 (40.0)  |                |
| CA199 (U/mL)                    |           |            | 0.783          |
| <37                             | 39 (53.4) | 39 (55.7)  |                |
| ≥37                             | 34 (46.6) | 31 (44.3)  |                |
| Location                        |           |            | 0.016          |
| head                            | 45 (61.6) | 29 (41.4)  |                |
| body/tail                       | 28 (38.4) | 41 (58.6)  |                |

|                                  |           |           |       |
|----------------------------------|-----------|-----------|-------|
| Neural Invasion                  |           |           | 0.923 |
| No                               | 38 (52.1) | 37 (52.9) |       |
| Yes                              | 35 (47.9) | 33 (47.1) |       |
| Chemotherapy                     |           |           | 0.771 |
| No                               | 32 (43.8) | 29 (41.4) |       |
| Yes                              | 41 (56.2) | 41 (58.6) |       |
| Chemotherapy (Yes)               |           |           | 0.888 |
| Gemcitabine                      | 16 (39.0) | 13 (31.7) |       |
| Gemcitabine +<br>Capecitabine    | 7 (17.1)  | 9 (22.0)  |       |
| Gemcitabine + nab-<br>paclitaxel | 12 (29.3) | 12 (29.3) |       |
| Gemcitabine + Tegafur            | 6 (14.6)  | 7 (17.1)  |       |

647 Note: All data are shown as numbers and percentages--numbers (percentage%). Chi-square Analysis  
648 was used in these data.

649 a: The Yate's correction for continuity was used in data of this group.

650 b: The Kruskal Wallis Test was used in data of this group.

651

652

653 **Table S2. Univariate and Multivariate Analysis for the Prognostic Factors**  
654 **of Overall Survival in PDAC Patients from Figure 1.**

655

| Variables                              | Univariate          |         | Multivariate        |         |
|----------------------------------------|---------------------|---------|---------------------|---------|
|                                        | Analysis            | P value | Analysis            | P value |
|                                        | HR (95% CI)         |         | HR (95% CI)         |         |
| Gender (male versus female)            | 1.529 (1.049-2.230) | 0.027   | 1.415 (0.953-2.099) | 0.085   |
| Age (≥62 years vs <62 years)           | 1.246 (0.871-1.782) | 0.229   |                     |         |
| pT status (T3 or T4 vs T1 or T2)       | 0.857 (0.587-1.252) | 0.425   |                     |         |
| pN status (N1-2 vs N0)                 | 1.753 (1.222-2.515) | 0.002   | 1.116 (0.390-3.196) | 0.838   |
| pM status (M1 vs M0)                   | 1.562 (0.636-3.840) | 0.331   |                     |         |
| AJCC stage (III or IV vs I or II)      | 1.793 (1.250-2.572) | 0.002   | 1.786 (1.243-2.568) | 0.002   |
| Histological grade (G3 vs G1 or<br>G2) | 1.558 (1.079-2.250) | 0.018   | 1.565 (1.082-2.265) | 0.018   |
| Tumor size (≤4 cm vs >4 cm)            | 0.840 (0.584-1.207) | 0.345   | -                   | -       |
| Recurrence (Yes vs No)                 | 1.786 (1.167-2.734) | 0.008   | 1.623 (1.045-2.522) | 0.031   |
| CEA (≥5 ng/mL vs <5ng/mL)              | 0.973 (0.681-1.390) | 0.881   |                     |         |
| CA199 (≥37 U/mL vs <37U/mL)            | 1.237 (0.863-1.771) | 0.247   | -                   | -       |
| Location (Head vs Body/Tail )          | 1.295 (0.899-1.867) | 0.165   | -                   | -       |
| Neural Invasion (Yes vs No)            | 1.123 (0.784-1.608) | 0.526   | -                   | -       |
| Chemotherapy (Yes vs No)               | 0.580 (0.403-0.853) | 0.003   | 0.761 (0.524-1.105) | 0.151   |
| SIRT5 expression (High vs Low)         | 0.590 (0.411-0.847) | 0.004   | 0.669 (0.462-0.970) | 0.034   |

656 Univariate and multivariate Cox proportional hazards regression were used to calculate Hazard ratio  
657 (HR), 95% confidence intervals (95% CI) and *p* values in SPSS 22.0.  
658

659 **Table S3. Univariate and Multivariate Analysis for the Prognostic Factors**  
 660 **of Disease-Free Survival in PDAC Patients from Figure 1.**  
 661

| Variables                           | Univariate          |                | Multivariate        |                |
|-------------------------------------|---------------------|----------------|---------------------|----------------|
|                                     | Analysis            | <i>P</i> value | Analysis            | <i>P</i> value |
|                                     | HR (95% CI)         |                | HR (95% CI)         |                |
| Gender (male versus female)         | 1.313 (0.920-1.875) | 0.134          |                     |                |
| Age (≥62 years vs <62 years)        | 1.190 (0.842-1.683) | 0.324          |                     |                |
| pT status (T3 or T4 vs T1 or T2)    | 0.932 (0.648-1.341) | 0.706          |                     |                |
| pN status (N1-2 vs N0)              | 1.580 (1.115-2.239) | 0.010          | 1.398 (0.492-3.977) | 0.529          |
| pM status (M1 vs M0)                | 1.302 (0.531-3.195) | 0.564          |                     |                |
| AJCC stage (III or IV vs I or II)   | 1.593 (1.125-2.256) | 0.009          | 1.605 (1.130-2.277) | 0.008          |
| Histological grade (G3 vs G1 or G2) | 1.413 (0.990-2.017) | 0.057          | 1.451 (1.014-2.076) | 0.042          |
| Tumor size (≤4 cm vs >4 cm)         | 0.858 (0.604-1.218) | 0.392          | -                   | -              |
| Recurrence (Yes vs No)              | 2.790 (1.807-4.308) | <0.001         | 2.572 (1.651-4.008) | <0.001         |
| CEA (≥5 ng/mL vs <5ng/mL)           | 0.985 (0.697-1.392) | 0.931          |                     |                |
| CA199 (≥37 U/mL vs <37U/mL)         | 1.139 (0.804-1.613) | 0.464          | -                   | -              |
| Location (Head vs Body/Tail)        | 1.211 (0.852-1.721) | 0.286          | -                   | -              |
| Neural Invasion (Yes vs No)         | 1.142 (0.807-1.618) | 0.454          | -                   | -              |
| Chemotherapy (Yes vs No)            | 0.587 (0.413-0.836) | 0.003          | 0.773 (0.540-1.108) | 0.161          |
| SIRT5 expression (High vs Low)      | 0.505 (0.355-0.719) | <0.001         | 0.605 (0.423-0.864) | 0.006          |

662 Univariate and multivariate Cox proportional hazards regression were used to calculate Hazard ratio  
 663 (HR), 95% confidence intervals (95% CI) and *p* values in SPSS 22.0.

664

665 **Table S4. Primers used in this study.**

| Oligonucleotides |                      |                         |
|------------------|----------------------|-------------------------|
| Primers for qPCR |                      |                         |
| hSIRT5-F         | Eurofins MWG Operons | GCCATAGCCGAGTGTGAGAC    |
| hSIRT5-R         | Eurofins MWG Operons | CAACTCCACAAGAGGTACATCG  |
| hGLS-F           | Eurofins MWG Operons | AGGGTCTGTTACCTAGCTTGG   |
| hGLS-R           | Eurofins MWG Operons | ACGTTTCGCAATCCTGTAGATTT |
| hGLS2-F          | Eurofins MWG Operons | GCCTGGGTGATTTGCTCTTTT   |
| hGLS2-R          | Eurofins MWG Operons | CCTTTAGTGCAGTGGTGAACCT  |
| hGLUD1-F         | Eurofins MWG Operons | GGGCTTTTGTATCCGTTACAGC  |
| hGLUD1-R         | Eurofins MWG Operons | GGTCAAACGGCCATAGCTGA    |
| hGOT1-F          | Eurofins MWG Operons | ATGGCACCTCCGTCAGTCT     |
| hGOT1-R          | Eurofins MWG Operons | AGTCATCCGTGCGATATGCTC   |
| hGOT2-F          | Eurofins MWG Operons | AGCCTTACGTTCTGCCTAGC    |
| hGOT2-R          | Eurofins MWG Operons | AAACCGGCCACTCTTCAAGAC   |
| hME1-F           | Eurofins MWG Operons | GAGTGCTGACATCTGACATTGA  |

|                                  |                               |                                   |
|----------------------------------|-------------------------------|-----------------------------------|
| hME1-R                           | Eurofins MWG Operons          | TTGGCTTCCGAAACACCAAAC             |
| hMDH1-F                          | Eurofins MWG Operons          | GGTGCAGCCTTAGATAAATACGC           |
| hMDH1-R                          | Eurofins MWG Operons          | AGTCAAGCAACTGAAGTTCTCC            |
| h18S rRNA-F                      | Sigma-Aldrich                 | CTACCACATCCAAGGAAGCA              |
| h18S rRNA-R                      | Sigma-Aldrich                 | TTTTTCGTCACTACCTCCCCG             |
| Primer for genotyping            |                               |                                   |
| Mice Kras <sup>G12D</sup> -Y116  | Sigma-Aldrich                 | TCCGAATTCAGTGACTACAGATG           |
| Mice Kras <sup>G12D</sup> -Y117  | Sigma-Aldrich                 | CTAGCCACCATGGCTTGAGT              |
| Mice Kras <sup>G12D</sup> -Y118  | Sigma-Aldrich                 | ATGTCTTTCCCCAGCACAGT              |
| Mice p53 <sup>R172H</sup> -T35   | Sigma-Aldrich                 | CTTGGAGACATAGCCCACTG              |
| Mice p53 <sup>R172H</sup> -T36   | Sigma-Aldrich                 | CTCTGGAATTCGCAAGCTA               |
| Mice p53 <sup>R172H</sup> -T37   | Sigma-Aldrich                 | TTACACATCCAGCCTCTGTGG             |
| Mice Pdx1-Cre-F                  | Sigma-Aldrich                 | CTGGACTACATCTTGAGTTGC             |
| Mice Pdx1-Cre-R                  | Sigma-Aldrich                 | GGTGTACGGTCAGTAAATTTG             |
| Mice Sirt5 <sup>lox/lox</sup> -F | Sigma-Aldrich                 | TGTGCTTGTACGTGCTGTGC              |
| Mice Sirt5 <sup>lox/lox</sup> -R | Sigma-Aldrich                 | CCCCTCACTCAGCTCACAAA              |
| Primers for site mutagenesis     |                               |                                   |
| GOT1-sequence-F                  | Sigma-Aldrich (HPLC purified) | TGCCTGGGCCATTTCGCTATTTTG          |
| GOT1-sequence-R                  | Sigma-Aldrich (HPLC purified) | TCACTGGATTTTGGTGACTGC             |
| GOT1-K276R-F                     | Sigma-Aldrich (HPLC purified) | CGA GAA CCT GAG AGC ATC CTG CAA G |
| GOT1-K276R-R                     | Sigma-Aldrich (HPLC purified) | TCCAACCACAGTCAGATTCCCGAC          |
| GOT1-K290R-F                     | Sigma-Aldrich (HPLC purified) | CGG ATC GTG CGG ATT ACT TGG TC    |
| GOT1-K290R-R                     | Sigma-Aldrich (HPLC purified) | CTC CAT CTG GGA AAG GAC TTG CAG   |
| GOT1-K369R-F                     | Sigma-Aldrich (HPLC purified) | CGG CAG GTT GAG TAT CTG GTC AAT G |
| GOT1-K369R-R                     | Sigma-Aldrich (HPLC purified) | GGG GTT CAA CCC AGT GAA GCT GAA C |
| sgGOT1-resistant-F               | Sigma-Aldrich (HPLC purified) | G AGA AAG GTC AAC CTG GGA GTG     |
| sgGOT1-resistant-R               | Sigma-Aldrich (HPLC purified) | GGGTCCGGATCCTCCCTGAAG             |
| SIRT5-H158Y-F                    | Sigma-Aldrich (HPLC purified) | TAT GGTAGCT TATTTAAAAC TCG        |

|                  |                               |                         |
|------------------|-------------------------------|-------------------------|
| SIRT5-H158Y-R    | Sigma-Aldrich (HPLC purified) | GATCTCCAGAAGGTTCTTGGTG  |
| H158Y-sequence-F | Sigma-Aldrich (HPLC purified) | A TGCGACCTCT CCAGATTGTC |
| H158Y-sequence-R | Sigma-Aldrich (HPLC purified) | GGAAGTTTCTCAACTGGGATGCT |

666
